# Supplementary material for: Quantifying cross-tissue diversity in proteasome complexes by mass spectrometry
Source: Royal Society of Chemistry journal article supplement (doi:10.1039/c004989a), 2010-05-24
Supplement: c004989a.pdf [file c004989a.pdf]

## Quantifying Cross-Tissue Diversity in Proteasome Complexes by Mass Spectrometry

### SUPPLEMENTARY INFORMATION

Sarah Pelletier<sup>1,2</sup>, Karianne G. Schuurman<sup>3</sup>, Celia R. Berkers<sup>2,3</sup>, Huib Ovaa<sup>2,3</sup>, Albert J.R. Heck<sup>1,2</sup> and Reinout Raijmakers<sup>1,2</sup>

1. Biomolecular Mass Spectrometry and Proteomics Group, Bijvoet Center for Biomolecular Research and Utrecht Institute for Pharmaceutical Sciences, Utrecht University, Padualaan 8, 3584 CH Utrecht, the Netherlands

2. Netherlands Proteomics Centre, Padualaan 8, 3584 CH Utrecht, the Netherlands

3. Netherlands Cancer Institute, Division of Cell Biology, Plesmanlaan 121, 1066 CX, Amsterdam, The Netherlands

## Detailed material and methods

### *Proteasome Purification*

Proteasome samples from heart, kidney, liver, lung, thymus and spleen of ten mice were purified based on a method previously described.<sup>1</sup> Briefly, unwanted proteins were precipitated from the homogenates with 35% or 40% saturated ammonium sulfate solution. The proteasome-containing supernatant was treated with 60% ammonium sulfate to precipitate the proteasomes. Precipitates were dissolved in 10mM Tris pH 7.4 and further cleaned and purified by overnight dialysis and sucrose gradient (10-40% or 10-45% m/v sucrose) centrifugation. The fractions containing proteasome activity were pooled and submitted to weak anion exchange separation using DEAE (diethylaminoethyl) Sephadex A-25 beads. The protein samples were loaded on a 23x2 cm gravity packed column containing approximately 2g of swelled beads in 10mM Tris pH 7.4 and eluted with 30 to 50 mL 10mM Tris solutions containing increasing NaCl concentration. Proteasome fractions typically eluted at around 300mM NaCl. Finally the proteasome fractions were pooled, concentrated using micropore filter centrifugation (Millipore, Amicon Ultra-4, 30.000 MWCO) and stored at -80 °C. Protein concentration was determined by Bradford assay (Bio-Rad) and ranged from 0.01 to 0.43µg/µL. Each step of the purification was monitored using the bodipyH fluorescent probe for proteasome activity, followed by SDS-PAGE as described previously.<sup>1, 2</sup> Band intensities were measured from SDS-PAGE gel by TotalLab TL100v2006 software (TotalLab Ltd., Newcastle upon Tyne).

### *Tryptic Digestions*

Prior to quantitative mass spectrometry analysis, approximately 1µg of proteasome sample was reduced with 1,4-dithiothreitol (6mM), alkylated with iodoacetamide (12mM) and digested with trypsin (1:25 protein/trypsin ratio) in ammonium bicarbonate 50mM. Samples were acidified to a 10% concentration of formic acid and analyzed by MS.

### *Nano LCMS/MS*

All LC-MS/MS analyses were performed on a nanoLC LTQ-Orbitrap (Thermo, San Jose, CA) mass spectrometer at a resolution of 60,000 at 400 m/z. For nanoLC, an Agilent 1200 series LC system was equipped with a 25 mm ReproSil-Pur C18-AQ (Dr. Maisch GmbH, Ammerbuch, Germany) trapping column (packed in-house, i.d., 100 µm; resin, 5 µm) and 400 mm ReproSil-Pur C18-AQ analytical column (packed in-house, i.d., 50 µm; resin, 3 µm). Buffer A was 0.6% HAc and Buffer B was 0.6% HAc/80% acetonitrile (ACN). Trapping was performed at 5 µL/min for 10 min, and elution was achieved with a gradient of 13–32% B in 52 minutes, 32–40% B in 5 minutes, 40–100% B in 2 minutes and 100%B for 2 minutes. The flow rate was passively split from 0.6 mL/min to 100 nL/min. Nanospray was achieved using in-house made distally coated fused silica emitters (o.d., 375 µm; i.d., 20 µm) biased to 1.8 kV. The mass spectrometer was operated in data dependent mode to automatically switch between MS and MS/MS. Survey full scan MS spectra were acquired from m/z 350 to m/z 1500 and the two most intense ions were fragmented in the linear ion trap using collisionally induced dissociation. The target ion setting was 5e5 for the Orbitrap, with a maximum fill time of 250 ms. Fragment ion spectra were acquired in the LTQ with a target ion setting of

1e4 and a maximum fill time of 100 ms. Dynamic exclusion for selected precursor ions was set at 30 seconds.

### *Data Processing and Analysis*

Raw MS data were converted to peak lists using the Bioworks Browser software, v3.3.1 or with the DTASuperCharge v1.31 program of MSQuant v1.5. For protein identification, MS/MS data were compared to all rodent proteins in the SwissProt database using Mascot v2.2.2 (Matrix Science) with trypsin as the enzyme, allowing 2 miss cleavages, a precursor tolerance of 15 ppm and a product ion tolerance of 0.5 Da. Carbamidomethylation of cysteine was set as a fixed modification and oxidation of methionine was included as a variable modification. Peptide identifications were accepted with a minimum Mascot score of 20 and an expect value of <0.05. Peptide abundance was calculated from extracted ion chromatograms (XIC) of the precursors ions using the MSQuant software v1.5. Low intensity peptides as well as peptides with a poor extracted ion chromatogram or MS/MS spectrum were excluded after manual inspection. All abundances were corrected for the relative intensity of the peptides included in the internal standard (477.78 m/z and 497.59 m/z) in each run. The protein intensity was defined as the average peptide intensity of all peptides observed for that protein. Relative abundance of active subunits was calculated by linear regression as shown below. All samples were analyzed in quadruplicate (two digests of the samples in duplicate) to minimize technical variability. All identification results are available for download in a Scaffold 2 file that may be downloaded from ProteomeCommons.org Tranche, <https://proteomecommons.org/tranche/>, using the following hash: fg8eM5MhpGI3Wp/fqq/wclc51R3wXU9EUgGTXrI6V9VgONyTRB2No9sZKWBCUBbBGDzEmaKaUreRndrmt9cQO7qTeAAAAAAAAAADRA==. The viewer is downloadable from <http://www.proteomesoftware.com>. All XIC intensities are supplied in supplementary tables 2-9.

**Supplementary Fig. 1**

Quantitative analyses of 20S proteasome subunits.

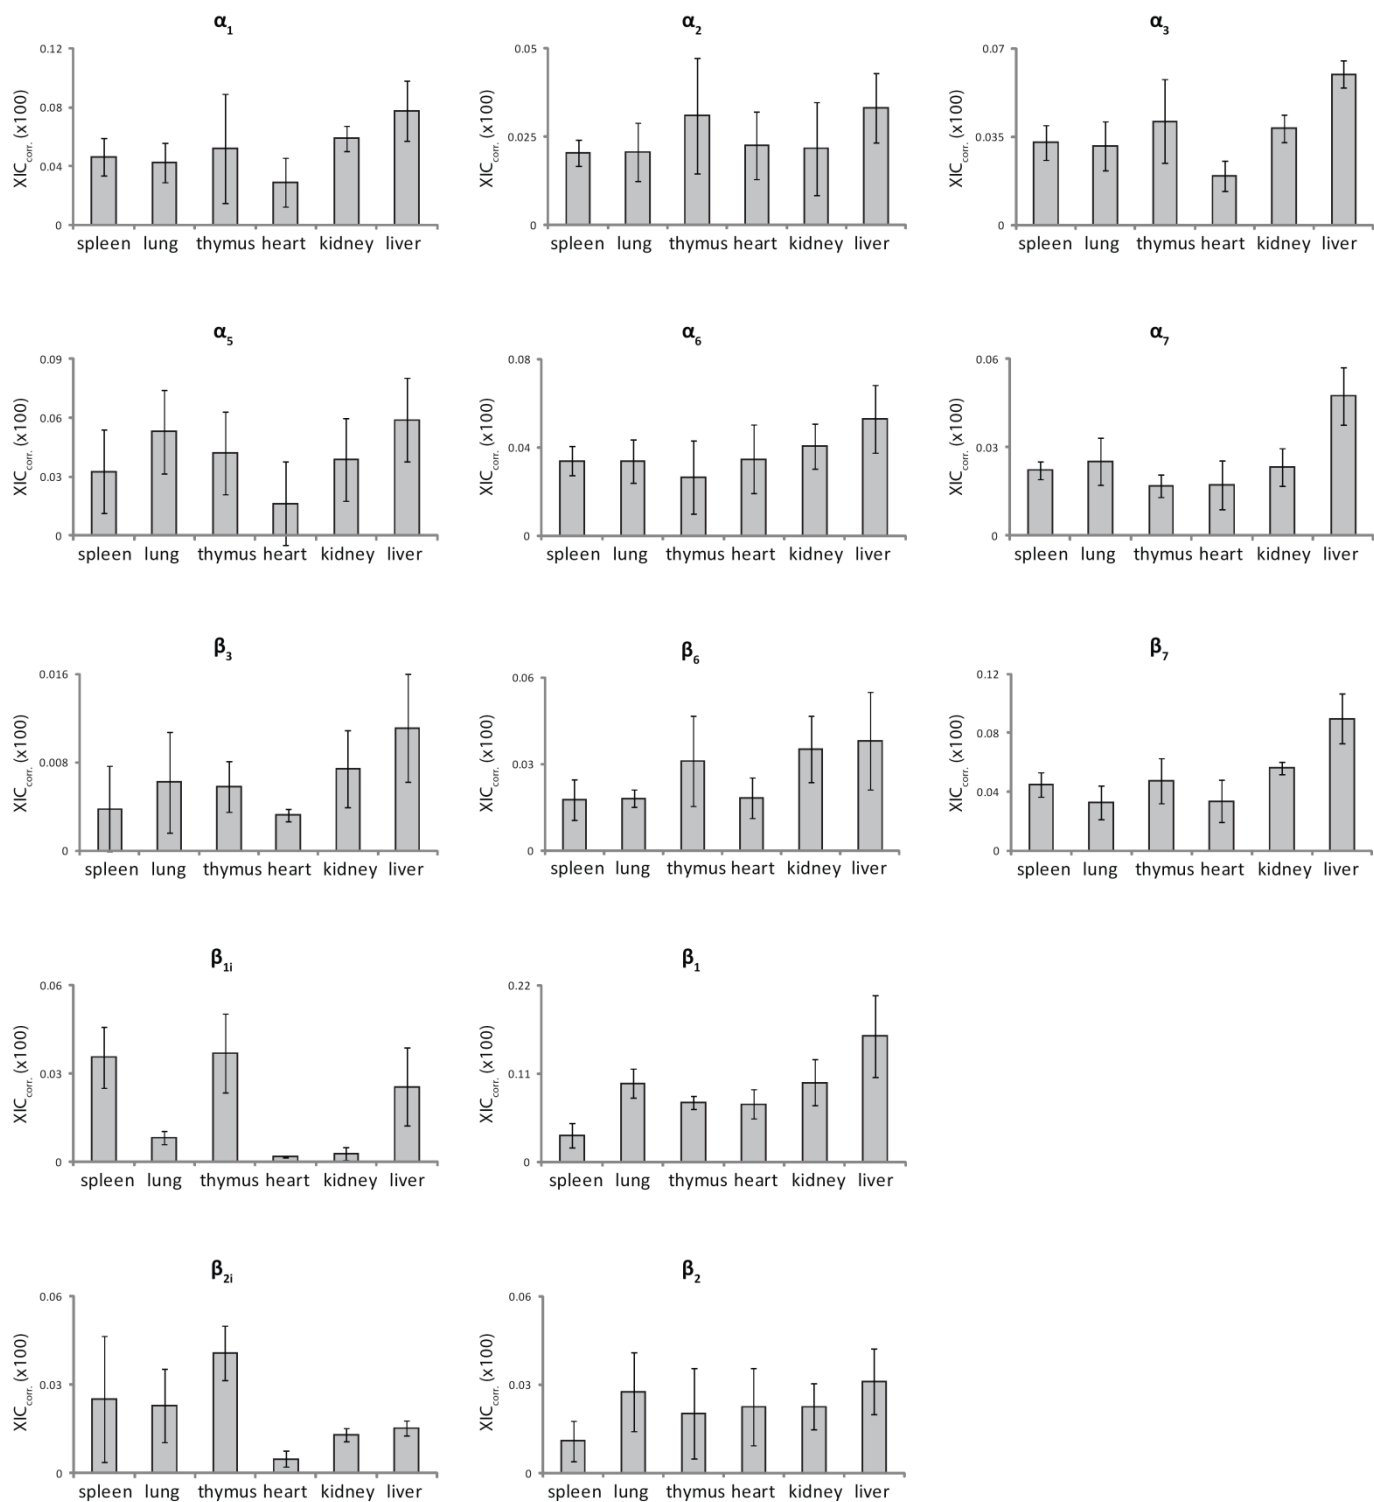

**Response factor calculation for relative abundance calculation from Fig. 2**

Using the corrected absolute intensities ( $XIC_{corr}$ ) for an active constitutive subunit ( $\beta_x$ ) and its immunoproteasome counterpart ( $\beta_{xi}$ ) from two different tissues and the assumption that together these subunits have 100% proteasome occupation, solving the following equations yields the response factors for both the constitutive ( $y$ ) and the immunosubunit ( $x$ ):

$$(\text{value } XIC_{corr. \text{ tissue 1 } \beta_{xi}}) x + (\text{value } XIC_{corr. \text{ tissue 1 } \beta_x}) y = 1$$

$$(\text{value } XIC_{corr. \text{ tissue 2 } \beta_{xi}}) x + (\text{value } XIC_{corr. \text{ tissue 2 } \beta_x}) y = 1$$

These calculations were performed for all 15 possible combinations of the 6 tissues to be able to calculate the median response factor for each active proteasome subunit. The response factors obtained were then used to correct the observed absolute intensities for each active subunit, allowing the calculation of the relative presence of the constitutive and the immunovariant of this subunit.

**Supplementary Table 1.**

Fluorescence intensity of 35 seconds scanned SDS-PAGE gel bands

|                            | <b>Spleen</b> | <b>Lung</b> | <b>Thymus</b> | <b>Heart</b> | <b>Kidney</b> |
|----------------------------|---------------|-------------|---------------|--------------|---------------|
|                            | Lane 1        | Lane 2      | Lane 3        | Lane 4       | Lane 5        |
|                            | Volume        | Volume      | Volume        | Volume       | Volume        |
| $\beta 2$                  | 36148.54      | 119907.9    | 151971.7      | 63240.88     | 1279617       |
| $\beta 2i$                 | 31612.95      | 50165.66    | 77222.89      |              | 207198.7      |
| $\beta 1 \beta 5i \beta 5$ | 57754.71      | 162177.3    | 156127.7      | 83392.99     | 1215673       |
| $\beta 1i$                 | 13440.27      | 21271.42    | 28027.71      |              | 80888.21      |

**Supplementary Table 2.** Corrected peptide XICs for all subunits in digest 1.

| Digest 1   | SwissProt ID          | Peptide | XICs        |             |             |             |             |             |
|------------|-----------------------|---------|-------------|-------------|-------------|-------------|-------------|-------------|
|            |                       |         | liver_corr  | spleen_corr | heart_corr  | kidney_corr | thymus_corr | lung_corr   |
| PSA1_MOUSE | AQPSQAAEPEAEK         |         | 0.000372291 | 0.000333175 | #N/A        | 0.000390252 | 0.000261988 | #N/A        |
| PSA1_MOUSE | FVFDRLPVS             |         | 0.001427048 | #N/A        | 0.000265627 | 0.000795076 | #N/A        | 0.000616317 |
| PSA1_MOUSE | IHQEYAMEAVK           |         | 0.000226172 | #N/A        | #N/A        | 0.000150213 | 0.000122313 | 5.74303E-05 |
| PSA1_MOUSE | KAQPSQAAEPEAEK        |         | 2.92672E-05 | #N/A        | #N/A        | #N/A        | #N/A        | 2.24104E-05 |
| PSA1_MOUSE | LLCNFMR               |         | 2.32028E-05 | #N/A        | #N/A        | 5.20272E-05 | #N/A        | 3.01393E-05 |
| PSA1_MOUSE | NQYDNDVTVWSPQGR       |         | 0.00309562  | 0.00137632  | 0.001808195 | 0.002261588 | 0.001655795 | 0.001705483 |
| PSA1_MOUSE | NVSGIVGK              |         | 0.000873111 | #N/A        | 0.000501484 | 0.000676538 | #N/A        | #N/A        |
| PSA1_MOUSE | SKTHAVLVALK           |         | 6.29249E-05 | 6.02551E-05 | 2.68534E-05 | 8.85517E-05 | 7.16711E-05 | 3.30632E-05 |
| PSA1_MOUSE | SKTHAVLVALKR          |         | 0.000107125 | #N/A        | 2.01946E-05 | 0.000119808 | #N/A        | 8.63E-05    |
| PSA1_MOUSE | THAVLVALK             |         | 5.28342E-05 | 5.65442E-05 | #N/A        | 0.000106918 | #N/A        | #N/A        |
| PSA1_MOUSE | THAVLVALKR            |         | 0.000200768 | 8.50577E-05 | 5.52657E-05 | 0.000124794 | 4.0863E-05  | 4.23156E-05 |
| PSA1_MOUSE | TQIPTQR               |         | 0.001415399 | #N/A        | #N/A        | #N/A        | #N/A        | #N/A        |
| PSA1_MOUSE | TYLER                 |         | 2.29075E-05 | 0.00014012  | 0.000197945 | #N/A        | #N/A        | #N/A        |
| PSA1_MOUSE | ALRETLPAEQDLTTK       |         | #N/A        | 0.00092295  | #N/A        | 0.001020688 | 0.001009987 | 0.001036802 |
| PSA1_MOUSE | AMSIGAR               |         | #N/A        | 9.58638E-05 | 6.33494E-05 | 2.69026E-05 | 2.72182E-05 | 0.000113686 |
| PSA1_MOUSE | ETLPAEQDLTTK          |         | #N/A        | 0.000867042 | 0.000794168 | 0.000938655 | 0.000839428 | 0.000585828 |
| PSA1_MOUSE | ILHVDNHIGISIAGLTADAR  |         | #N/A        | 3.29985E-05 | #N/A        | #N/A        | #N/A        | #N/A        |
| PSA1_MOUSE | LVSLIGSK              |         | #N/A        | #N/A        | #N/A        | 0.000568908 | 0.00051197  | 0.000509195 |
| PSA2_MOUSE | AANGVVLATEKK          |         | 9.30167E-05 | 9.66683E-05 | 5.10818E-05 | 7.58797E-05 | 0.000101161 | 3.52934E-05 |
| PSA2_MOUSE | GYSFSLTTFSPSGK        |         | 0.001078405 | 0.00041736  | 0.000586105 | 0.000665648 | 0.000426977 | #N/A        |
| PSA2_MOUSE | HIGLVYSGMGPDYR        |         | 5.11612E-05 | 4.72279E-05 | #N/A        | 7.29562E-05 | #N/A        | 6.80494E-05 |
| PSA2_MOUSE | KLAQQYYLVYQEIPTAQLVQR |         | 0.000110435 | #N/A        | #N/A        | #N/A        | #N/A        | #N/A        |
| PSA2_MOUSE | QKSILYDER             |         | 2.98529E-05 | #N/A        | #N/A        | 2.49495E-05 | #N/A        | #N/A        |
| PSA2_MOUSE | RLTPTEVR              |         | 0.000437333 | #N/A        | #N/A        | #N/A        | #N/A        | #N/A        |
| PSA2_MOUSE | SILYDER               |         | 0.001609616 | #N/A        | #N/A        | #N/A        | #N/A        | #N/A        |
| PSA2_MOUSE | SVHKVEPITK            |         | 0.000135923 | 0.000214337 | 0.000249314 | 3.39375E-05 | 0.000213773 | #N/A        |
| PSA2_MOUSE | TFLEKR                |         | 2.40436E-05 | #N/A        | 9.31164E-06 | #N/A        | 2.20351E-05 | 3.93543E-05 |
| PSA2_MOUSE | AANGVVLATEKKQK        |         | #N/A        | 2.29846E-05 | #N/A        | #N/A        | 3.96556E-06 | #N/A        |
| PSA2_MOUSE | LVQIEYALAAVAGGAPSVGIK |         | #N/A        | 0.000341333 | 7.30375E-05 | 2.34302E-05 | #N/A        | #N/A        |
| PSA2_MOUSE | TFLEK                 |         | #N/A        | 0.000239679 | #N/A        | #N/A        | 0.000265537 | 0.000223064 |
| PSA2_MOUSE | AANGVVLATEK           |         | #N/A        | #N/A        | #N/A        | #N/A        | #N/A        | 0.000316357 |
| PSA3_MOUSE | AVENSSTAIGIR          |         | 0.002556032 | #N/A        | #N/A        | #N/A        | 2.28539E-05 | #N/A        |
| PSA3_MOUSE | CKDGVVFGVEK           |         | 0.000173688 | #N/A        | #N/A        | 9.81905E-05 | #N/A        | 4.08372E-05 |
| PSA3_MOUSE | DIREEAEK              |         | 0.000103007 | 0.000151758 | #N/A        | 0.000124249 | 0.000409827 | 8.95356E-05 |
| PSA3_MOUSE | DIREEAEKYAK           |         | 0.00099935  | 8.62959E-05 | 5.57185E-05 | 8.20164E-05 | 0.000597178 | 0.000615739 |
| PSA3_MOUSE | DVVKEVAK              |         | 0.00022652  | 0.000194335 | #N/A        | 0.000160888 | 0.000214755 | 0.000139389 |
| PSA3_MOUSE | HVGMAVAGLLADAR        |         | 0.00015381  | #N/A        | 5.43055E-05 | #N/A        | #N/A        | #N/A        |
| PSA3_MOUSE | IYIVHDEVK             |         | 0.000118183 | 3.3E-05     | #N/A        | 4.40469E-05 | #N/A        | #N/A        |
| PSA3_MOUSE | RLFNVD                |         | 3.35898E-05 | #N/A        | #N/A        | 1.41448E-05 | #N/A        | 9.1657E-06  |
| PSA3_MOUSE | SLADIAREEASNFR        |         | 0.000344124 | #N/A        | 7.31237E-05 | #N/A        | #N/A        | #N/A        |
| PSA3_MOUSE | SNFGYNIPLK            |         | 0.001562158 | #N/A        | #N/A        | #N/A        | #N/A        | #N/A        |
| PSA3_MOUSE | TEIEKLQMK             |         | 1.59854E-05 | #N/A        | #N/A        | #N/A        | 1.55423E-05 | #N/A        |
| PSA3_MOUSE | VFQVEYAMK             |         | 0.000776575 | 0.000339364 | #N/A        | 0.000515015 | 8.74144E-05 | 0.000152611 |
| PSA3_MOUSE | EEASNFR               |         | #N/A        | 1.6608E-05  | #N/A        | #N/A        | 9.9522E-05  | #N/A        |
| PSA3_MOUSE | LFNVDR                |         | #N/A        | 0.000417427 | 0.000147825 | #N/A        | #N/A        | #N/A        |
| PSA3_MOUSE | SLADIAR               |         | #N/A        | 0.000243889 | #N/A        | #N/A        | #N/A        | #N/A        |
| PSA3_MOUSE | IYIVHDEVKDK           |         | #N/A        | #N/A        | #N/A        | #N/A        | #N/A        | 6.14914E-05 |
| PSA3_MOUSE | DGVVFGVEK             |         | #N/A        | #N/A        | #N/A        | 5.05334E-05 | #N/A        | #N/A        |
| PSA4_MOUSE | EVEQLIK               |         | 0.00042612  | #N/A        | #N/A        | 0.000308316 | #N/A        | #N/A        |
| PSA4_MOUSE | QAYTQFGGK             |         | 0.000562478 | #N/A        | #N/A        | #N/A        | #N/A        | 4.191E-05   |
| PSA4_MOUSE | QDYKEGEMTLK           |         | 7.123E-05   | #N/A        | 5.62388E-05 | 4.12237E-05 | 4.20544E-05 | 2.41557E-05 |
| PSA4_MOUSE | QKEVEQLIK             |         | 0.000491467 | #N/A        | 0.00041915  | #N/A        | #N/A        | #N/A        |
| PSA4_MOUSE | SALALAVK              |         | 0.000588531 | 0.000302564 | 0.000185165 | 0.000295926 | 0.000291458 | 0.000199923 |

| Digest 1     |                        | XICs        |             |             |             |             |             |
|--------------|------------------------|-------------|-------------|-------------|-------------|-------------|-------------|
| SwissProt ID | Peptide                | liver_corr  | spleen_corr | heart_corr  | kidney_corr | thymus_corr | lung_corr   |
| PSA4_MOUSE   | TTIFSPGR               | 0.001861474 | 0.000784222 | 0.000596264 | 0.001048445 | 0.000708754 | 0.000736567 |
| PSA4_MOUSE   | VEIATLTR               | 0.000558922 | #N/A        | 0.000173275 | 0.000602842 | 0.00043144  | #N/A        |
| PSA4_MOUSE   | LSAEKVEIATLTR          | #N/A        | 0.000351115 | 0.000109794 | 0.000356228 | 0.000459993 | 0.000192802 |
| PSA4_MOUSE   | QKEVEQLIKK             | #N/A        | 4.72535E-06 | #N/A        | #N/A        | 5.55975E-06 | #N/A        |
| PSA4_MOUSE   | VLNKTMDVSK             | #N/A        | #N/A        | #N/A        | #N/A        | 3.14245E-05 | 9.15294E-06 |
| PSA4_MOUSE   | ATCIGNNSAAAVSMLK       | #N/A        | #N/A        | #N/A        | #N/A        | 4.3543E-05  | #N/A        |
| PSA4_MOUSE   | EVEQLIKK               | #N/A        | #N/A        | #N/A        | 1.31869E-05 | #N/A        | #N/A        |
| PSA5_MOUSE   | AIGSASEGAQSSSLQEVYHK   | 0.000424066 | 0.000186345 | 0.000198228 | 0.000201823 | 0.000244588 | 0.000184705 |
| PSA5_MOUSE   | GPQLFHMDPSGTFVQCDAAR   | 7.17467E-05 | #N/A        | #N/A        | 4.44072E-05 | #N/A        | #N/A        |
| PSA5_MOUSE   | GVNTFSPEGR             | 0.002571133 | 0.001131656 | #N/A        | 0.001128597 | 0.001102962 | 0.001055728 |
| PSA5_MOUSE   | ITSPLMEPSSIEK          | 0.001645647 | #N/A        | #N/A        | 0.000555127 | 0.000510923 | 0.000354077 |
| PSA5_MOUSE   | LFQVEYAIK              | 1.96176E-05 | #N/A        | #N/A        | 0.000130635 | 0.000135107 | 0.000198882 |
| PSA5_MOUSE   | RITSPLMPEPSSIEK        | 6.63472E-05 | #N/A        | #N/A        | #N/A        | #N/A        | #N/A        |
| PSA5_MOUSE   | SSLILK                 | 0.000827071 | 0.000196171 | #N/A        | 0.000379925 | 0.000307565 | 0.000274186 |
| PSA5_MOUSE   | TLIDKAR                | 2.70707E-05 | 2.40738E-05 | #N/A        | 1.52673E-05 | 7.51764E-06 | 2.24503E-05 |
| PSA6_MOUSE   | AINQGGLTSVAVR          | 0.003020636 | 0.001529234 | #N/A        | 0.001753451 | #N/A        | #N/A        |
| PSA6_MOUSE   | ARYEAANWK              | 0.000147365 | 5.92207E-05 | #N/A        | 0.000104405 | 5.77534E-05 | 7.18885E-05 |
| PSA6_MOUSE   | CDPAGYCGFK             | 0.000315521 | 5.63661E-05 | #N/A        | 0.000121102 | 4.80329E-05 | 4.07205E-05 |
| PSA6_MOUSE   | GKDCAVITQK             | 0.000410099 | 0.000152855 | 6.84475E-05 | 0.000214311 | 0.000115417 | 0.0001079   |
| PSA6_MOUSE   | GSSAGFDRHITIFSPGR      | 6.18253E-05 | #N/A        | #N/A        | 9.716E-05   | 5.83767E-05 | 8.99047E-05 |
| PSA6_MOUSE   | HITIFSPGR              | 0.002165581 | 0.000802595 | #N/A        | 0.001236817 | #N/A        | 0.000866016 |
| PSA6_MOUSE   | ITESIGCVMTGMTADSR      | 0.000104304 | #N/A        | 5.08947E-05 | 7.68096E-05 | #N/A        | #N/A        |
| PSA6_MOUSE   | KVPDKLLDSSTVTHLFK      | 0.000323332 | #N/A        | #N/A        | #N/A        | #N/A        | #N/A        |
| PSA6_MOUSE   | LLDSSTVTHLFK           | 0.000429868 | 5.06274E-05 | 5.40214E-05 | 0.000129954 | 0.000135256 | 7.57012E-05 |
| PSA6_MOUSE   | LYQVEYAFK              | 0.001545525 | #N/A        | 0.000451938 | #N/A        | #N/A        | 0.000822057 |
| PSA6_MOUSE   | QTESTSFLEK             | 0.002306109 | 0.001179071 | #N/A        | 0.001482856 | #N/A        | 0.000912192 |
| PSA6_MOUSE   | VPDKLLDSSTVTHLFK       | 2.09131E-05 | #N/A        | #N/A        | #N/A        | #N/A        | #N/A        |
| PSA6_MOUSE   | YEAANWK                | 0.000527879 | #N/A        | #N/A        | 0.000448025 | #N/A        | #N/A        |
| PSA6_MOUSE   | YGYEIPVDMCK            | 2.34078E-05 | #N/A        | #N/A        | #N/A        | #N/A        | #N/A        |
| PSA6_MOUSE   | QTESTSFLEKK            | #N/A        | #N/A        | #N/A        | 3.32354E-05 | #N/A        | 4.08136E-05 |
| PSA6_MOUSE   | GSSAGFDR               | #N/A        | #N/A        | #N/A        | #N/A        | 1.09397E-05 | #N/A        |
| PSA7_MOUSE   | AITVFSPDGHLFQVEYAEAVK  | 0.00014609  | 0.00029221  | #N/A        | #N/A        | #N/A        | #N/A        |
| PSA7_MOUSE   | GKDIVLVGVEKK           | 6.73958E-05 | 7.16613E-05 | #N/A        | 4.97696E-05 | 6.04319E-05 | 7.86919E-05 |
| PSA7_MOUSE   | ILNPEIEK               | 0.001320644 | 0.001176712 | 0.001214776 | 0.001195469 | 0.000960181 | 0.000668276 |
| PSA7_MOUSE   | LYVEDPVTVEYITR         | 0.001589539 | 0.000892746 | 0.000794064 | 0.000942813 | 0.00063729  | #N/A        |
| PSA7_MOUSE   | LYQTDPSGTYHAWK         | 0.000411824 | 0.000211656 | 0.000132101 | 0.000317075 | 0.000250355 | #N/A        |
| PSA7_MOUSE   | NYTDDAIETDDLTIK        | 0.00370846  | 0.001460691 | 0.002160887 | 0.002229449 | #N/A        | 0.001762025 |
| PSA7_MOUSE   | YIASLKQR               | 7.57094E-06 | #N/A        | #N/A        | #N/A        | #N/A        | #N/A        |
| PSA7_MOUSE   | YVAIEK                 | 4.91015E-05 | #N/A        | #N/A        | #N/A        | #N/A        | 1.55919E-05 |
| PSA7_MOUSE   | AITVFSPDGHLFQVEYAEAVKK | #N/A        | 0.000121582 | #N/A        | #N/A        | #N/A        | #N/A        |
| PSA7_MOUSE   | NIELAVMR               | #N/A        | 0.000244593 | #N/A        | 0.000274865 | 0.000230566 | #N/A        |
| PSA7_MOUSE   | YIASLK                 | #N/A        | 0.000207348 | #N/A        | #N/A        | #N/A        | 0.00020694  |
| PSA7_MOUSE   | ALLEVVQSGGK            | #N/A        | #N/A        | #N/A        | #N/A        | 0.001623903 | 0.001405238 |
| PSA7_MOUSE   | DIVVLGVEKK             | #N/A        | #N/A        | #N/A        | #N/A        | #N/A        | 3.11288E-05 |
| PSA7_MOUSE   | DIVVLGVEK              | #N/A        | #N/A        | #N/A        | #N/A        | 2.29591E-05 | #N/A        |
| PSA7_MOUSE   | GKDIVLVGVEK            | #N/A        | #N/A        | 0.000172    | 0.000727857 | 0.000534739 | #N/A        |
| PSA7_MOUSE   | EFLEKNYTDIAETDDLTIK    | #N/A        | #N/A        | 2.72222E-05 | #N/A        | #N/A        | #N/A        |
| PSA7_MOUSE   | SVAKLQDER              | #N/A        | #N/A        | #N/A        | 1.47864E-05 | #N/A        | #N/A        |
| PSA7_MOUSE   | SVREFLEK               | #N/A        | #N/A        | #N/A        | 5.27265E-05 | #N/A        | #N/A        |
| PSA7_MOUSE   | YVAIEKEK               | #N/A        | #N/A        | #N/A        | 6.28593E-06 | #N/A        | #N/A        |
| PSB1_MOUSE   | AGGSASAMLQPLLDNQVGFK   | 0.000245848 | 8.06531E-05 | 0.000423373 | 0.000495838 | #N/A        | #N/A        |
| PSB1_MOUSE   | DVFISAAER              | 0.000468011 | #N/A        | #N/A        | 0.000399593 | 0.000345035 | #N/A        |
| PSB1_MOUSE   | EGIREETVPLR            | 5.51477E-05 | 4.03255E-05 | 3.02293E-05 | 5.41914E-05 | 4.43739E-05 | #N/A        |
| PSB1_MOUSE   | GAVYSFDPVGSYQR         | 0.001745217 | 0.000206573 | 0.000172397 | 0.000518309 | 0.000236094 | 0.000157942 |
| PSB1_MOUSE   | ICIVTK                 | 0.000533601 | 0.000146141 | #N/A        | 0.000154835 | #N/A        | 0.000124668 |



| Digest 1     |                      | XICs        |             |             |             |             |             |
|--------------|----------------------|-------------|-------------|-------------|-------------|-------------|-------------|
| SwissProt ID | Peptide              | liver_corr  | spleen_corr | heart_corr  | kidney_corr | thymus_corr | lung_corr   |
| PSB1_MOUSE   | LVKDVFISSAER         | 0.000210767 | 0.000220057 | 0.000148996 | 0.000218281 | 0.000214736 | 0.000143045 |
| PSB1_MOUSE   | NMQNVEHVPLTLDR       | 0.000126435 | #N/A        | #N/A        | #N/A        | 6.80263E-05 | 0.000108086 |
| PSB1_MOUSE   | EGIREETVPLRK         | #N/A        | 0.000154696 | #N/A        | #N/A        | #N/A        | #N/A        |
| PSB1_MOUSE   | LSEGFSIHTR           | #N/A        | 0.00033704  | #N/A        | 0.00041827  | 0.000381755 | 0.00032223  |
| PSB1_MOUSE   | DVYTGDLAR            | #N/A        | #N/A        | #N/A        | 0.000883394 | #N/A        | #N/A        |
| PSB10_MOUSE  | ALSTPTEPVQR          | 0.00030649  | 0.00136334  | #N/A        | 0.000267266 | 0.000809921 | 0.00045736  |
| PSB10_MOUSE  | DGVILGADTR           | 0.000129684 | 0.000411361 | 2.61209E-05 | 9.77935E-05 | 0.00030245  | #N/A        |
| PSB10_MOUSE  | IHFIAPK              | 3.21111E-05 | 5.5892E-05  | #N/A        | 1.46045E-05 | #N/A        | 1.60014E-05 |
| PSB10_MOUSE  | MELHALSTGR           | #N/A        | 2.48087E-05 | #N/A        | #N/A        | #N/A        | #N/A        |
| PSB10_MOUSE  | ATNDSVVADKSCCK       | #N/A        | #N/A        | #N/A        | #N/A        | 1.29457E-05 | 1.40192E-05 |
| PSB10_MOUSE  | ATNDSVVADK           | #N/A        | #N/A        | #N/A        | #N/A        | 4.1811E-05  | #N/A        |
| PSB2_MOUSE   | CLEELQK              | 6.45569E-05 | #N/A        | 1.00072E-05 | 2.13733E-05 | 1.03791E-05 | #N/A        |
| PSB2_MOUSE   | CLEELQKR             | 3.08122E-05 | #N/A        | #N/A        | #N/A        | #N/A        | #N/A        |
| PSB2_MOUSE   | ERAVELLRK            | 1.18115E-05 | #N/A        | #N/A        | #N/A        | #N/A        | #N/A        |
| PSB2_MOUSE   | FILNLPTFSVR          | 0.000114616 | #N/A        | #N/A        | #N/A        | #N/A        | #N/A        |
| PSB2_MOUSE   | KCLEELQK             | 2.42749E-05 | #N/A        | #N/A        | #N/A        | #N/A        | #N/A        |
| PSB2_MOUSE   | NGYELSPAAANFTR       | 0.000390302 | 0.000536404 | 0.00035267  | 0.00086823  | #N/A        | 0.000697151 |
| PSB2_MOUSE   | NVQLYK               | 0.000495865 | 0.000236371 | #N/A        | 0.000272325 | 0.00023387  | 0.000198715 |
| PSB2_MOUSE   | RNLADCLR             | 0.000223578 | 0.000101229 | #N/A        | #N/A        | 9.26392E-05 | 0.000156843 |
| PSB2_MOUSE   | VAASNIVQMKDDHDK      | 7.06221E-05 | #N/A        | #N/A        | 5.05532E-05 | 6.91479E-05 | #N/A        |
| PSB2_MOUSE   | YYTPTISR             | 0.000703247 | #N/A        | #N/A        | 0.000281608 | #N/A        | #N/A        |
| PSB2_MOUSE   | DDHDKMFK             | #N/A        | 4.73677E-06 | #N/A        | #N/A        | 5.19849E-06 | 3.86152E-06 |
| PSB2_MOUSE   | VAASNIVQMK           | #N/A        | 0.000141177 | #N/A        | 0.000190684 | #N/A        | #N/A        |
| PSB2_MOUSE   | ERAVELLR             | #N/A        | #N/A        | #N/A        | #N/A        | #N/A        | 6.0527E-06  |
| PSB3_MOUSE   | GKNCVAIAADR          | 4.14161E-05 | 2.7739E-05  | #N/A        | #N/A        | 2.42769E-05 | 8.31156E-06 |
| PSB3_MOUSE   | GKNCVAIAADRR         | 5.76576E-05 | 1.15623E-05 | #N/A        | 2.04278E-05 | #N/A        | #N/A        |
| PSB3_MOUSE   | LNLVELKEGR           | 2.63378E-05 | #N/A        | #N/A        | 8.84993E-06 | 1.00696E-05 | 1.98816E-05 |
| PSB3_MOUSE   | NCVAIAADRR           | 7.30982E-05 | 5.13999E-06 | #N/A        | 1.3015E-05  | #N/A        | #N/A        |
| PSB3_MOUSE   | NCVAIAADR            | #N/A        | 3.99888E-05 | #N/A        | 6.87654E-05 | #N/A        | 1.65368E-05 |
| PSB3_MOUSE   | FGIQAQMVTTDFQK       | #N/A        | #N/A        | #N/A        | 9.35615E-05 | #N/A        | 0.000130026 |
| PSB3_MOUSE   | FRLNLYELKEGR         | #N/A        | #N/A        | #N/A        | #N/A        | #N/A        | 5.62558E-06 |
| PSB3_MOUSE   | LNLVELK              | #N/A        | #N/A        | #N/A        | 0.000219138 | 0.000167925 | 0.000119806 |
| PSB3_MOUSE   | FGPYYTEPVIAGLDPK     | #N/A        | #N/A        | #N/A        | #N/A        | 0.00020097  | #N/A        |
| PSB3_MOUSE   | LYIGLAGLATDVQTAQR    | #N/A        | #N/A        | #N/A        | #N/A        | 3.91221E-05 | #N/A        |
| PSB4_MOUSE   | EVLEKQPVLSQTEAR      | 0.000106638 | 3.47336E-05 | #N/A        | #N/A        | 3.87588E-05 | 5.06193E-05 |
| PSB4_MOUSE   | FQIATVTEK            | 0.001564289 | 0.000791334 | 0.000397469 | 0.000741431 | 0.000760744 | 0.000549025 |
| PSB4_MOUSE   | QPVLSQTEAR           | 0.00160144  | 0.000667094 | #N/A        | 0.000884227 | 0.000589546 | 0.000375512 |
| PSB4_MOUSE   | AHISWLTR             | #N/A        | 0.000142673 | #N/A        | 0.000148443 | 0.000135726 | 0.000113875 |
| PSB4_MOUSE   | VNDSTMLGASGDYADFQYLK | #N/A        | 0.000157661 | 8.24155E-05 | 0.000140536 | 7.66142E-05 | #N/A        |
| PSB4_MOUSE   | FRNISR               | #N/A        | #N/A        | #N/A        | #N/A        | #N/A        | 6.3124E-05  |
| PSB4_MOUSE   | TQNPMTVGTGTVLGVK     | #N/A        | #N/A        | 0.000174151 | 0.000680766 | #N/A        | #N/A        |
| PSB5_MOUSE   | AIYQATYR             | 0.000231747 | 4.00169E-05 | #N/A        | 0.000261567 | #N/A        | 0.000103783 |
| PSB5_MOUSE   | ATAGAYIASQTVK        | 0.000674816 | 8.82622E-05 | 0.00020233  | 0.000616756 | 3.6231E-05  | #N/A        |
| PSB5_MOUSE   | ATAGAYIASQTVKK       | 6.74371E-05 | #N/A        | #N/A        | #N/A        | #N/A        | 1.21709E-05 |
| PSB5_MOUSE   | DAYSGGAVNLYHVR       | 0.000451091 | 5.03276E-05 | 0.000174875 | 0.000439797 | 2.35577E-05 | 0.000150176 |
| PSB5_MOUSE   | FLHGIVVAADSR         | 7.00157E-05 | 1.41436E-05 | 5.12775E-05 | 7.83246E-05 | #N/A        | 6.12195E-05 |
| PSB5_MOUSE   | ISVAAASK             | 3.42452E-05 | #N/A        | #N/A        | 6.43881E-05 | #N/A        | #N/A        |
| PSB5_MOUSE   | RAIQATYR             | 0.000281962 | 4.96739E-05 | 0.000124757 | 0.000286387 | #N/A        | 0.000125508 |
| PSB5_MOUSE   | RGPLYVDSEGNR         | 4.25983E-05 | #N/A        | #N/A        | #N/A        | #N/A        | #N/A        |
| PSB5_MOUSE   | VSSDNVADLHDK         | 7.64202E-05 | #N/A        | 3.39968E-05 | 9.21168E-05 | #N/A        | #N/A        |
| PSB5_MOUSE   | IYELR                | #N/A        | #N/A        | #N/A        | 0.000150972 | #N/A        | 6.58169E-05 |
| PSB5_MOUSE   | GPGLYYVDSEGNR        | #N/A        | #N/A        | 6.66059E-05 | 0.000199761 | #N/A        | #N/A        |
| PSB6_MOUSE   | LAAIQESGVER          | 0.002658268 | #N/A        | #N/A        | #N/A        | 0.000835558 | 0.001148518 |
| PSB6_MOUSE   | QVLLGDQIPK           | 0.001773775 | #N/A        | #N/A        | 0.001321387 | 0.000802003 | 0.000950505 |
| PSB6_MOUSE   | TTTGSYIANR           | 0.001790684 | #N/A        | #N/A        | 0.001172311 | 0.000418898 | 0.000507062 |

| Digest 1     |                      | XICs        |             |             |             |             |             |
|--------------|----------------------|-------------|-------------|-------------|-------------|-------------|-------------|
| SwissProt ID | Peptide              | liver_corr  | spleen_corr | heart_corr  | kidney_corr | thymus_corr | lung_corr   |
| PSB7_MOUSE   | ATEGMVVADK           | 4.35566E-05 | #N/A        | #N/A        | 0.000160554 | #N/A        | 3.31818E-05 |
| PSB7_MOUSE   | ATEGMVVADKNCSK       | 0.000199793 | 3.50736E-05 | 8.60603E-05 | 9.00946E-05 | 3.91618E-05 | 2.67249E-05 |
| PSB7_MOUSE   | DGIVLGADTR           | 0.000557689 | #N/A        | 0.000186441 | 0.000318963 | #N/A        | 0.000132684 |
| PSB7_MOUSE   | FRPDMEEEEAK          | 8.45482E-05 | #N/A        | #N/A        | 5.65302E-05 | 2.45065E-05 | #N/A        |
| PSB7_MOUSE   | FRPDMEEEEAKK         | 0.000154953 | 1.83027E-05 | #N/A        | #N/A        | #N/A        | #N/A        |
| PSB7_MOUSE   | LDFLRPFSVPNKK        | 0.000198312 | #N/A        | #N/A        | #N/A        | #N/A        | 0.000119531 |
| PSB7_MOUSE   | QMLFR                | #N/A        | 2.87255E-05 | #N/A        | #N/A        | 3.1751E-05  | #N/A        |
| PSB8_MOUSE   | AIAYATHR             | 7.06367E-05 | 0.000323794 | 3.05017E-05 | 6.41709E-05 | 0.000312677 | 0.00010281  |
| PSB8_MOUSE   | DNYSGGVNMVYHMK       | 4.60984E-05 | #N/A        | #N/A        | 2.75602E-05 | #N/A        | 2.77166E-05 |
| PSB8_MOUSE   | FQHGIVAVDSR          | 6.72704E-05 | 8.88674E-05 | #N/A        | #N/A        | 0.000102538 | #N/A        |
| PSB8_MOUSE   | KPGGLYVDDNGTR        | 8.70498E-05 | 7.39608E-05 | #N/A        | 1.60137E-05 | 8.55203E-05 | 3.16719E-05 |
| PSB8_MOUSE   | LLSNMMLQYR           | 3.91397E-05 | #N/A        | #N/A        | #N/A        | 6.95877E-05 | 4.60254E-05 |
| PSB8_MOUSE   | QDLSPEEAYDLGR        | 0.000613308 | 0.00049493  | #N/A        | 0.000205322 | 0.000730351 | 0.000121028 |
| PSB8_MOUSE   | VESSDVSDLLYK         | 0.000592358 | 0.000460451 | 5.00014E-05 | 0.000141868 | 0.000620013 | #N/A        |
| PSB8_MOUSE   | ISVSAASK             | #N/A        | 0.000170695 | #N/A        | #N/A        | 0.000253497 | #N/A        |
| PSB8_MOUSE   | RAIAYATHR            | #N/A        | 5.26238E-05 | #N/A        | #N/A        | 5.09746E-05 | 2.45238E-05 |
| PSB8_MOUSE   | ATAGSYISSLR          | #N/A        | #N/A        | #N/A        | #N/A        | 0.000551742 | #N/A        |
| PSB8_MOUSE   | LYYLR                | #N/A        | #N/A        | #N/A        | 2.41057E-05 | #N/A        | #N/A        |
| PSB9_MOUSE   | DGSSGGVIYLVTTAAGVDHR | 3.14294E-05 | 7.10511E-05 | #N/A        | #N/A        | #N/A        | #N/A        |
| PSB9_MOUSE   | EGGQVYGTMGMLIR       | 8.28903E-06 | #N/A        | #N/A        | #N/A        | #N/A        | #N/A        |
| PSB9_MOUSE   | VSAGTAVVNR           | 0.000370126 | 0.000334444 | #N/A        | #N/A        | 0.000251875 | 8.36614E-05 |
| PSB9_MOUSE   | FTTNAITLAMNR         | #N/A        | #N/A        | #N/A        | 1.91457E-05 | #N/A        | #N/A        |

**Supplementary Table 3.** Corrected peptide XICs averaged per subunit in digest 1.

| Digest 1     |            | average XICs/subunit |                |                  |                 |                  |                 |
|--------------|------------|----------------------|----------------|------------------|-----------------|------------------|-----------------|
| SwissProt ID | Systematic | Pept. ave spleen     | Pept. ave lung | Pept. ave thymus | Pept. ave heart | Pept. ave kidney | Pept. ave liver |
| PSA6_MOUSE   | $\alpha$ 1 | 0.000547138          | 0.000336355    | 7.09626E-05      | 0.000156325     | 0.000518011      | 0.000814455     |
| PSA2_MOUSE   | $\alpha$ 2 | 0.000197084          | 0.000136423    | 0.000172241      | 0.00019377      | 0.000149467      | 0.000396643     |
| PSA4_MOUSE   | $\alpha$ 3 | 0.000360657          | 0.000200752    | 0.000251778      | 0.000256648     | 0.000380881      | 0.00065146      |
| PSA7_MOUSE   | $\alpha$ 4 | 0.000519911          | 0.000595413    | 0.000540053      | 0.000750175     | 0.00058111       | 0.000912578     |
| PSA5_MOUSE   | $\alpha$ 5 | 0.000384561          | 0.000348338    | 0.000384777      | 0.000198228     | 0.000350826      | 0.000706587     |
| PSA1_MOUSE   | $\alpha$ 6 | 0.000397033          | 0.000403248    | 0.000504582      | 0.000414787     | 0.000522923      | 0.000608359     |
| PSA3_MOUSE   | $\alpha$ 7 | 0.000185334          | 0.000158396    | 0.000206728      | 8.27432E-05     | 0.000136135      | 0.000588585     |
| PSB6_MOUSE   | $\beta$ 1  | #DIV/0!              | 0.000868695    | 0.000685487      | #DIV/0!         | 0.001246849      | 0.002074242     |
| PSB9_MOUSE   | $\beta$ 1i | 0.000202747          | 8.36614E-05    | 0.000251875      | #DIV/0!         | 1.91457E-05      | 0.000136615     |
| PSB7_MOUSE   | $\beta$ 2  | 2.73672E-05          | 7.80304E-05    | 3.18064E-05      | 0.000136251     | 0.000156535      | 0.000206475     |
| PSB10_MOUSE  | $\beta$ 2i | 0.00046385           | 0.00016246     | 0.000291782      | 2.61209E-05     | 0.000126555      | 0.000156095     |
| PSB3_MOUSE   | $\beta$ 3  | 2.11075E-05          | 5.00312E-05    | 8.84727E-05      | #DIV/0!         | 7.06263E-05      | 4.96274E-05     |
| PSB2_MOUSE   | $\beta$ 4  | 0.000203983          | 0.000212525    | 8.22469E-05      | 0.000181338     | 0.000280796      | 0.000212969     |
| PSB5_MOUSE   | $\beta$ 5  | 4.84848E-05          | 8.64458E-05    | 2.98943E-05      | 0.000108974     | 0.000243341      | 0.000214481     |
| PSB8_MOUSE   | $\beta$ 5i | 0.000237903          | 5.89626E-05    | 0.000308545      | 4.02516E-05     | 7.98402E-05      | 0.000216552     |
| PSB1_MOUSE   | $\beta$ 6  | 0.000169355          | 0.000171194    | 0.000215003      | 0.000193749     | 0.000392839      | 0.000483575     |
| PSB4_MOUSE   | $\beta$ 7  | 0.000358699          | 0.000230431    | 0.000320278      | 0.000218012     | 0.000519081      | 0.001090789     |

**Supplementary Table 4.** Corrected peptide XICs for all subunits in digest 1 (duplicate).

| Dupl. Digest 1 | SwissProt ID         | Peptide | XICs        |             |             |             |             |             |
|----------------|----------------------|---------|-------------|-------------|-------------|-------------|-------------|-------------|
|                |                      |         | liver_corr  | spleen_corr | heart_corr  | kidney_corr | thymus_corr | lung_corr   |
| PSA1_MOUSE     | AMSIGAR              |         | 8.82914E-05 | 0.000117788 | 0.000131544 | 0.000109795 | 0.000134345 | 4.09171E-05 |
| PSA1_MOUSE     | AQPSQAAEPAEK         |         | 0.000381834 | 0.000525024 | 0.00055608  | 0.000473461 | 0.000355506 | #N/A        |
| PSA1_MOUSE     | AQSELAHQK            |         | 0.000187198 | 7.05182E-05 | 5.47523E-05 | 0.000117637 | 7.36577E-05 | 6.2489E-05  |
| PSA1_MOUSE     | ETLPAEQDLTTK         |         | 0.002556975 | 0.001626428 | #N/A        | 0.001802256 | #N/A        | 0.001406733 |
| PSA1_MOUSE     | IHQIEYAMEAVK         |         | 4.97843E-05 | 0.000180621 | #N/A        | #N/A        | 0.000107506 | 0.000108087 |
| PSA1_MOUSE     | KAQPSQAAEPAEK        |         | 2.17207E-05 | 2.30063E-05 | #N/A        | #N/A        | #N/A        | #N/A        |
| PSA1_MOUSE     | LLCNFMR              |         | 2.49847E-05 | #N/A        | #N/A        | 2.01095E-05 | #N/A        | #N/A        |
| PSA1_MOUSE     | LVSLIGSK             |         | 0.000893167 | #N/A        | 0.000510434 | #N/A        | #N/A        | #N/A        |
| PSA1_MOUSE     | QECLDSR              |         | 6.51371E-05 | #N/A        | #N/A        | #N/A        | #N/A        | #N/A        |
| PSA1_MOUSE     | QGSATVGLK            |         | 0.001019259 | #N/A        | #N/A        | 0.000652385 | #N/A        | 0.000486267 |
| PSA1_MOUSE     | RAQSELAHQK           |         | 8.08842E-05 | 2.39595E-05 | #N/A        | 4.38925E-05 | #N/A        | 2.11337E-05 |
| PSA1_MOUSE     | RAQSELAHQK           |         | 9.62513E-06 | #N/A        | #N/A        | #N/A        | #N/A        | #N/A        |
| PSA1_MOUSE     | SKTHAVLVALK          |         | 2.44151E-05 | 3.88316E-05 | #N/A        | 7.21167E-05 | 4.51732E-05 | 2.32568E-05 |
| PSA1_MOUSE     | SKTHAVLVALKR         |         | 2.73546E-05 | 3.5226E-05  | 2.33938E-05 | #N/A        | 3.64417E-05 | 4.06874E-05 |
| PSA1_MOUSE     | THAVLVALK            |         | 5.01547E-05 | #N/A        | #N/A        | 0.000139187 | #N/A        | #N/A        |
| PSA1_MOUSE     | THAVLVALKR           |         | 3.63791E-05 | 4.61395E-05 | 6.10941E-05 | 3.83186E-05 | 2.19963E-05 | 0.000100536 |
| PSA1_MOUSE     | TQIPTQR              |         | 0.001667487 | #N/A        | #N/A        | 0.001036921 | 0.00069322  | #N/A        |
| PSA1_MOUSE     | AQPSQAAEPAEKADPEMEH  |         | #N/A        | 0.000162161 | 0.00088225  | 2.44685E-05 | 0.000148804 | 0.000304892 |
| PSA1_MOUSE     | KAQPSQAAEPAEKADPEMEH |         | #N/A        | 5.48568E-05 | 0.000228403 | #N/A        | 0.000119492 | 0.000106136 |
| PSA1_MOUSE     | FVFDRLPVS            |         | #N/A        | #N/A        | 0.000488323 | #N/A        | #N/A        | #N/A        |
| PSA1_MOUSE     | NVSGIVGK             |         | #N/A        | #N/A        | #N/A        | 0.00070378  | #N/A        | #N/A        |
| PSA2_MOUSE     | AANGVVLATEKK         |         | 0.00014566  | #N/A        | #N/A        | 0.000102725 | #N/A        | 3.44483E-05 |
| PSA2_MOUSE     | GYSFLTTFSPSGK        |         | 0.000170703 | #N/A        | 0.000544472 | #N/A        | #N/A        | #N/A        |
| PSA2_MOUSE     | HIGLVYSGMGPDYR       |         | 1.7851E-05  | 5.60091E-05 | #N/A        | 3.17211E-05 | 9.87473E-05 | #N/A        |
| PSA2_MOUSE     | QKSILYDER            |         | 1.06587E-05 | #N/A        | #N/A        | #N/A        | #N/A        | #N/A        |
| PSA2_MOUSE     | RLTPTEVR             |         | 0.000587982 | 0.000346235 | #N/A        | 0.00049427  | 0.000305012 | 0.000341579 |
| PSA2_MOUSE     | SILYDER              |         | 0.001797164 | #N/A        | #N/A        | 0.000964369 | #N/A        | #N/A        |
| PSA2_MOUSE     | SVHKVEPITK           |         | 0.000358704 | 0.000174571 | 0.000171407 | 0.000226476 | 0.000181777 | 0.000224149 |
| PSA2_MOUSE     | TFLEKR               |         | 0.000120824 | #N/A        | #N/A        | 8.32284E-05 | #N/A        | #N/A        |
| PSA2_MOUSE     | AANGVVLATEKKQK       |         | #N/A        | #N/A        | #N/A        | #N/A        | #N/A        | 5.42656E-06 |
| PSA2_MOUSE     | AANGVVLATEK          |         | #N/A        | #N/A        | #N/A        | 0.000886569 | #N/A        | #N/A        |
| PSA3_MOUSE     | AVENSSTAIGIR         |         | 0.003470258 | 0.000878088 | 0.000945269 | 0.001687519 | #N/A        | 0.001025246 |
| PSA3_MOUSE     | CKDGVVFGVEK          |         | 0.000179289 | 4.37534E-05 | #N/A        | 0.000102834 | 4.03012E-05 | 3.48855E-05 |
| PSA3_MOUSE     | DGVVFGVEK            |         | 0.000181514 | #N/A        | #N/A        | #N/A        | #N/A        | #N/A        |
| PSA3_MOUSE     | DIREEAQYAK           |         | 0.000154192 | 0.000256576 | #N/A        | 7.32655E-05 | #N/A        | #N/A        |
| PSA3_MOUSE     | DVVKEVAK             |         | 0.000553862 | 0.000170129 | 0.000183673 | 0.000282916 | 0.000191517 | 0.000163725 |
| PSA3_MOUSE     | EEASNFR              |         | 0.000608897 | 0.000226164 | #N/A        | 0.000302205 | 0.000199834 | #N/A        |
| PSA3_MOUSE     | ESLKEEDESDDNM        |         | 0.000147339 | #N/A        | #N/A        | 6.40961E-05 | 0.000174349 | 0.000113915 |
| PSA3_MOUSE     | HEIVPK               |         | 7.0069E-05  | 6.43655E-05 | 6.30947E-05 | 8.49806E-05 | 4.81104E-05 | 2.56829E-05 |
| PSA3_MOUSE     | IYIVHDEVK            |         | 3.16421E-05 | #N/A        | #N/A        | 4.14929E-05 | 3.63347E-05 | #N/A        |
| PSA3_MOUSE     | IYIVHDEVKDK          |         | 0.000138869 | #N/A        | #N/A        | #N/A        | #N/A        | #N/A        |
| PSA3_MOUSE     | LFNVDR               |         | 0.000972305 | 0.000313621 | 0.000175133 | 0.000380361 | #N/A        | #N/A        |
| PSA3_MOUSE     | LYEESNK              |         | 6.12855E-05 | 7.04941E-05 | #N/A        | 9.40644E-05 | 5.76356E-05 | #N/A        |
| PSA3_MOUSE     | RLFNVD               |         | 3.74419E-05 | #N/A        | #N/A        | 1.65913E-05 | #N/A        | #N/A        |
| PSA3_MOUSE     | SLADIAR              |         | 0.00065282  | #N/A        | #N/A        | #N/A        | #N/A        | 0.000197715 |
| PSA3_MOUSE     | SNFGYNIPLK           |         | 0.000935517 | #N/A        | 8.84348E-05 | 0.000321641 | #N/A        | 0.000106337 |
| PSA3_MOUSE     | TEIEKLQMK            |         | 1.37437E-05 | 2.78491E-05 | #N/A        | 1.84323E-05 | 3.47118E-05 | 3.73778E-05 |
| PSA3_MOUSE     | VQVEYAMK             |         | 0.000234897 | #N/A        | 0.000278242 | #N/A        | 0.000323914 | #N/A        |
| PSA3_MOUSE     | DIREEAEK             |         | #N/A        | 0.000461024 | #N/A        | #N/A        | #N/A        | #N/A        |
| PSA3_MOUSE     | SLADIAREEASNFR       |         | #N/A        | #N/A        | 0.000143281 | #N/A        | 2.87764E-05 | #N/A        |
| PSA3_MOUSE     | HVGMAVAGLLADAR       |         | #N/A        | #N/A        | 2.56892E-05 | #N/A        | #N/A        | #N/A        |
| PSA4_MOUSE     | EVEQLIK              |         | 0.000571504 | 0.000367515 | 0.000378283 | 0.000432464 | #N/A        | #N/A        |
| PSA4_MOUSE     | EVEQLIKK             |         | 2.60352E-05 | #N/A        | #N/A        | #N/A        | #N/A        | #N/A        |

| Dupl. Digest 1 | SwissProt ID        | Peptide | XICs        |             |             |             |             |             |
|----------------|---------------------|---------|-------------|-------------|-------------|-------------|-------------|-------------|
|                |                     |         | liver_corr  | spleen_corr | heart_corr  | kidney_corr | thymus_corr | lung_corr   |
| PSA4_MOUSE     | QAYTQFGGK           |         | 0.000638174 | #N/A        | #N/A        | 0.000125512 | #N/A        | 3.82286E-05 |
| PSA4_MOUSE     | QDYKEGEMTLK         |         | 4.33607E-05 | #N/A        | 3.43126E-05 | 0.000100731 | 6.75948E-05 | 4.22083E-05 |
| PSA4_MOUSE     | QKEVEQLIKK          |         | 9.66807E-06 | #N/A        | 6.28741E-06 | #N/A        | #N/A        | #N/A        |
| PSA4_MOUSE     | TTIFSPGR            |         | 0.002507125 | 0.000932314 | #N/A        | 0.001479168 | 0.001324958 | 0.001405045 |
| PSA4_MOUSE     | VEIATLTR            |         | 0.000651873 | 0.000551972 | 0.000417692 | 0.000703615 | #N/A        | 0.000263587 |
| PSA4_MOUSE     | HEEEEEAKAER         |         | #N/A        | 4.10682E-06 | #N/A        | #N/A        | #N/A        | #N/A        |
| PSA4_MOUSE     | KHEEEEEAKAER        |         | #N/A        | 2.37601E-05 | #N/A        | #N/A        | 1.86351E-05 | #N/A        |
| PSA4_MOUSE     | ESGKTVIR            |         | #N/A        | #N/A        | #N/A        | #N/A        | #N/A        | 1.57414E-05 |
| PSA4_MOUSE     | LLDEVFSEK           |         | #N/A        | #N/A        | #N/A        | #N/A        | 0.000215175 | 0.000108697 |
| PSA4_MOUSE     | LSAEKVEIATLTR       |         | #N/A        | #N/A        | 0.000191311 | #N/A        | #N/A        | 0.000152785 |
| PSA4_MOUSE     | VLNKTMDSVK          |         | #N/A        | #N/A        | #N/A        | #N/A        | 1.46348E-05 | #N/A        |
| PSA4_MOUSE     | SALALAVK            |         | #N/A        | #N/A        | 0.000265137 | #N/A        | #N/A        | #N/A        |
| PSA4_MOUSE     | ATCIGNNSAAAVSMLK    |         | #N/A        | #N/A        | #N/A        | 7.03932E-05 | #N/A        | #N/A        |
| PSA4_MOUSE     | EVEQLIKKHEEEAK      |         | #N/A        | #N/A        | #N/A        | 1.54369E-05 | #N/A        | #N/A        |
| PSA5_MOUSE     | AIGSASEGAQSSLQEVYHK |         | 0.00028047  | 0.000130854 | 6.57413E-05 | 0.000177137 | 0.000101391 | #N/A        |
| PSA5_MOUSE     | GPQLFHMDPSGTFVQCDAR |         | 3.91224E-05 | #N/A        | #N/A        | 5.02355E-05 | #N/A        | #N/A        |
| PSA5_MOUSE     | GVNTFSPGR           |         | 0.003157307 | #N/A        | 0.000962431 | 0.001248031 | 0.001144016 | 0.001632008 |
| PSA5_MOUSE     | LFQVEYAEIAIK        |         | 5.60654E-05 | 5.74592E-05 | 0.0001168   | #N/A        | #N/A        | 3.69425E-05 |
| PSA5_MOUSE     | TLIDKAR             |         | 7.4653E-05  | #N/A        | 3.24246E-05 | 3.1541E-05  | #N/A        | 2.88009E-05 |
| PSA5_MOUSE     | SSLILK              |         | #N/A        | 0.000215292 | 0.000195003 | #N/A        | #N/A        | #N/A        |
| PSA5_MOUSE     | SEYDRGVNTFSPGR      |         | #N/A        | #N/A        | 0.000137268 | 3.82295E-05 | #N/A        | 9.89031E-05 |
| PSA6_MOUSE     | AINQGGTLVAVR        |         | 0.003467081 | 0.001761114 | 0.001122495 | 0.002362952 | #N/A        | 0.002139696 |
| PSA6_MOUSE     | ARYEAAVWK           |         | 0.000109101 | 2.20807E-05 | #N/A        | #N/A        | 2.58984E-05 | #N/A        |
| PSA6_MOUSE     | ATAAGVKTESTSFLEK    |         | 1.01705E-05 | 4.70671E-06 | #N/A        | 1.56702E-05 | #N/A        | 2.78165E-05 |
| PSA6_MOUSE     | CDPAGYYCGFK         |         | 0.000290071 | #N/A        | #N/A        | 0.000131242 | 3.58728E-05 | 3.56567E-05 |
| PSA6_MOUSE     | GKDCAVIVTQK         |         | 0.000407898 | 0.000138123 | 0.000157119 | 0.000210174 | 0.000107895 | 0.000122252 |
| PSA6_MOUSE     | GSSAGFDR            |         | 0.00024693  | 0.000103603 | #N/A        | 0.000148871 | 0.000106821 | 0.000103443 |
| PSA6_MOUSE     | HITIFSPGR           |         | 0.002012198 | 0.000730708 | #N/A        | #N/A        | 0.001047483 | 0.00100307  |
| PSA6_MOUSE     | LLDSSVTVHLFK        |         | 0.000109671 | #N/A        | #N/A        | #N/A        | #N/A        | #N/A        |
| PSA6_MOUSE     | QTESTSFLEK          |         | 0.00304724  | 0.001170359 | 0.001093491 | 0.001520362 | 0.00131101  | 0.001313043 |
| PSA6_MOUSE     | YGVEIPVDMLCK        |         | 7.92243E-06 | #N/A        | #N/A        | #N/A        | #N/A        | #N/A        |
| PSA6_MOUSE     | ILTEAEIDAHLVALAERD  |         | #N/A        | 3.72203E-05 | #N/A        | #N/A        | #N/A        | #N/A        |
| PSA6_MOUSE     | ITESIGCVMTGMTADSR   |         | #N/A        | 1.77857E-05 | #N/A        | #N/A        | #N/A        | #N/A        |
| PSA6_MOUSE     | LYQVEYAFK           |         | #N/A        | #N/A        | #N/A        | #N/A        | #N/A        | 0.000552922 |
| PSA6_MOUSE     | QTESTSFLEKK         |         | #N/A        | #N/A        | 3.75863E-05 | #N/A        | 1.56829E-05 | 3.61027E-05 |
| PSA6_MOUSE     | YEAAVWK             |         | #N/A        | #N/A        | 0.000239551 | 0.000438645 | #N/A        | #N/A        |
| PSA7_MOUSE     | ALLEVVQSGGK         |         | 0.001967323 | #N/A        | #N/A        | #N/A        | 0.001072459 | #N/A        |
| PSA7_MOUSE     | ARVECQSHR           |         | 2.12398E-06 | #N/A        | #N/A        | #N/A        | #N/A        | #N/A        |
| PSA7_MOUSE     | DIVVLGVEKK          |         | 1.92442E-05 | 5.08184E-06 | #N/A        | 6.06508E-06 | #N/A        | 1.49026E-05 |
| PSA7_MOUSE     | GKDIVVLGVEK         |         | 0.000630462 | 0.00075928  | 0.000596718 | #N/A        | #N/A        | 0.000746027 |
| PSA7_MOUSE     | GKDIVVLGVEKK        |         | 6.23979E-05 | 1.98902E-05 | #N/A        | 3.99486E-05 | 3.6542E-05  | 9.76689E-05 |
| PSA7_MOUSE     | GSTAVGVR            |         | 0.000112817 | #N/A        | #N/A        | #N/A        | 6.2542E-05  | #N/A        |
| PSA7_MOUSE     | ILNPEIEIK           |         | 0.001816956 | 0.001332619 | #N/A        | 0.00206924  | 0.001604824 | 0.001255684 |
| PSA7_MOUSE     | KGSTAVGVR           |         | 3.16019E-05 | #N/A        | #N/A        | 1.89042E-05 | #N/A        | 1.43689E-05 |
| PSA7_MOUSE     | LYQTDPSGTYHAWK      |         | 0.000494493 | 0.000163016 | #N/A        | 0.000228547 | 0.00022441  | 8.21673E-05 |
| PSA7_MOUSE     | NIELAVMR            |         | 0.000179002 | #N/A        | 0.000106808 | 0.000316341 | 0.000185234 | 0.000177114 |
| PSA7_MOUSE     | NYTDDAIETDDLTIK     |         | 0.001939579 | #N/A        | 0.001501632 | #N/A        | #N/A        | #N/A        |
| PSA7_MOUSE     | YVAEIEKEK           |         | 1.14338E-05 | #N/A        | #N/A        | #N/A        | #N/A        | #N/A        |
| PSA7_MOUSE     | YVAEIEKEEENEK       |         | 2.19192E-05 | 3.00777E-05 | 0.000889971 | 3.37881E-05 | #N/A        | #N/A        |
| PSA7_MOUSE     | YVAEIEK             |         | #N/A        | #N/A        | #N/A        | #N/A        | #N/A        | 4.23764E-05 |
| PSA7_MOUSE     | SVREFLEK            |         | #N/A        | #N/A        | #N/A        | 3.49183E-05 | 2.67949E-05 | #N/A        |
| PSA7_MOUSE     | DIVVLGVEK           |         | #N/A        | #N/A        | 2.58642E-05 | #N/A        | #N/A        | #N/A        |
| PSA7_MOUSE     | LTVEDPVTVEYITR      |         | #N/A        | #N/A        | 6.82878E-05 | #N/A        | #N/A        | #N/A        |
| PSB1_MOUSE     | DVFISAER            |         | 0.000611657 | #N/A        | #N/A        | 0.000563649 | 0.000312233 | #N/A        |
| PSB1_MOUSE     | DVYTGDLR            |         | 0.001371784 | #N/A        | #N/A        | 0.000896053 | #N/A        | #N/A        |

| Dupl. Digest 1 | SwissProt ID         | Peptide | XICs        |             |             |             |             |             |
|----------------|----------------------|---------|-------------|-------------|-------------|-------------|-------------|-------------|
|                |                      |         | liver_corr  | spleen_corr | heart_corr  | kidney_corr | thymus_corr | lung_corr   |
| PSB1_MOUSE     | EGIREETVPLR          |         | 7.4071E-05  | 6.84158E-05 | 6.39695E-05 | 9.67306E-05 | 6.44924E-05 | 2.70653E-05 |
| PSB1_MOUSE     | EGIREETVPLRK         |         | 0.000180837 | 0.000250539 | #N/A        | #N/A        | #N/A        | 0.000124854 |
| PSB1_MOUSE     | GAVYSFDPVGSYQR       |         | 0.00128339  | 0.000563749 | 0.000453563 | 0.000921038 | 0.00048829  | 0.000165816 |
| PSB1_MOUSE     | ICIVTK               |         | 0.000363571 | #N/A        | #N/A        | #N/A        | #N/A        | #N/A        |
| PSB1_MOUSE     | LSEGFSIHTR           |         | 0.000455318 | 0.000231341 | 0.000248968 | 0.000400743 | 0.000249888 | 0.0003364   |
| PSB1_MOUSE     | NMQNVEHVPLTLDR       |         | 9.6807E-05  | 6.64545E-05 | #N/A        | 5.96973E-05 | #N/A        | #N/A        |
| PSB1_MOUSE     | LVKDFVISAER          |         | #N/A        | #N/A        | 0.000135919 | #N/A        | #N/A        | 7.08255E-05 |
| PSB1_MOUSE     | AGGSASAMLQPLLDNQVGFK |         | #N/A        | #N/A        | 0.00018109  | #N/A        | #N/A        | #N/A        |
| PSB10_MOUSE    | ALSTPTEPVQR          |         | 0.000303253 | 0.001286323 | #N/A        | 0.000309898 | 0.00088309  | 0.0005378   |
| PSB10_MOUSE    | ATNSDVVADK           |         | 5.98659E-05 | 0.000254166 | #N/A        | #N/A        | 0.000136377 | #N/A        |
| PSB10_MOUSE    | ATNSDVVADKCEK        |         | #N/A        | 4.95662E-06 | #N/A        | #N/A        | #N/A        | #N/A        |
| PSB10_MOUSE    | DGVILGADTR           |         | #N/A        | 0.00054604  | #N/A        | #N/A        | 0.000373745 | 0.000240742 |
| PSB10_MOUSE    | FAPGTTPLVTR          |         | #N/A        | 0.001046973 | #N/A        | #N/A        | 0.000734678 | #N/A        |
| PSB10_MOUSE    | IHFIAPK              |         | #N/A        | 5.10296E-05 | #N/A        | 1.52707E-05 | 4.62888E-05 | #N/A        |
| PSB10_MOUSE    | MELHALSTGR           |         | #N/A        | 2.76154E-05 | #N/A        | #N/A        | #N/A        | #N/A        |
| PSB10_MOUSE    | YRFAPGTTPLVTR        |         | #N/A        | 1.44859E-05 | #N/A        | #N/A        | #N/A        | #N/A        |
| PSB2_MOUSE     | AVELLR               |         | 0.000157544 | #N/A        | #N/A        | #N/A        | #N/A        | #N/A        |
| PSB2_MOUSE     | CLEELQK              |         | 7.78509E-05 | #N/A        | #N/A        | 1.88286E-05 | #N/A        | #N/A        |
| PSB2_MOUSE     | KCLEELQKR            |         | 7.35951E-06 | #N/A        | #N/A        | #N/A        | #N/A        | #N/A        |
| PSB2_MOUSE     | MRNGYELSPTAAANFTR    |         | 1.04665E-05 | #N/A        | #N/A        | 1.78403E-05 | #N/A        | #N/A        |
| PSB2_MOUSE     | NLADCLR              |         | 0.000376232 | #N/A        | #N/A        | 0.000271949 | #N/A        | #N/A        |
| PSB2_MOUSE     | NVQLYK               |         | 0.000472298 | 0.000258127 | 0.000182694 | 0.000339135 | 0.000305193 | #N/A        |
| PSB2_MOUSE     | VAASNIVQMK           |         | 8.73735E-05 | 0.00019882  | 0.000117836 | 0.000127763 | 0.000185222 | 0.00015717  |
| PSB2_MOUSE     | VAASNIVQMKDDHDK      |         | 1.56647E-05 | 2.84957E-05 | #N/A        | #N/A        | 5.13771E-05 | #N/A        |
| PSB2_MOUSE     | YYTPTISR             |         | 0.000777695 | #N/A        | #N/A        | 0.000274794 | #N/A        | #N/A        |
| PSB2_MOUSE     | NGYELSPTAAANFTR      |         | #N/A        | 0.001135865 | 0.000792974 | #N/A        | #N/A        | #N/A        |
| PSB2_MOUSE     | RNLADCLR             |         | #N/A        | #N/A        | 0.000145768 | 0.000208659 | 0.00018505  | 0.000252964 |
| PSB3_MOUSE     | GKNCAIAADR           |         | 4.64883E-05 | 1.94667E-05 | #N/A        | 3.31566E-05 | #N/A        | 9.2163E-06  |
| PSB3_MOUSE     | LNLVELK              |         | 0.000380235 | #N/A        | 5.82774E-05 | #N/A        | #N/A        | 6.02667E-05 |
| PSB3_MOUSE     | LNLVELKEGR           |         | 1.19358E-05 | 3.80849E-06 | #N/A        | #N/A        | #N/A        | #N/A        |
| PSB3_MOUSE     | NCVAIAADR            |         | 0.000137896 | #N/A        | #N/A        | #N/A        | 3.33435E-05 | #N/A        |
| PSB3_MOUSE     | NCVAIAADRR           |         | 4.26076E-05 | #N/A        | #N/A        | 1.3382E-05  | #N/A        | #N/A        |
| PSB3_MOUSE     | GKNCAIAADRR          |         | #N/A        | #N/A        | 1.93091E-05 | 1.37116E-05 | #N/A        | #N/A        |
| PSB3_MOUSE     | LYIGLAGLATDVQTVAGR   |         | #N/A        | #N/A        | #N/A        | 6.25198E-05 | #N/A        | #N/A        |
| PSB4_MOUSE     | AIHSWLTR             |         | 0.000182578 | #N/A        | 9.06053E-05 | #N/A        | 0.000128041 | #N/A        |
| PSB4_MOUSE     | EVLEKQPVLSQTEAR      |         | 6.47791E-05 | #N/A        | 0.000348991 | 5.7371E-05  | 0.000315466 | 9.63527E-05 |
| PSB4_MOUSE     | QPVLSQTEAR           |         | 0.001958685 | 0.000616987 | 0.000515822 | 0.001064742 | 0.000684513 | #N/A        |
| PSB4_MOUSE     | TQNPMTVTGTSVLGVK     |         | 0.000509438 | 0.000458619 | 0.000280292 | #N/A        | 0.000613621 | 0.00037326  |
| PSB4_MOUSE     | FQIATVTEK            |         | #N/A        | 0.000776907 | 0.002507453 | 0.001283675 | 0.000793184 | 0.001002085 |
| PSB4_MOUSE     | SYNRFQIATVTEK        |         | #N/A        | 2.0399E-05  | 3.33792E-05 | #N/A        | 2.2271E-05  | 2.98702E-05 |
| PSB4_MOUSE     | FRNISR               |         | #N/A        | #N/A        | 1.93922E-05 | #N/A        | 1.50182E-05 | #N/A        |
| PSB4_MOUSE     | VNDSTMLGASGDYADFQYLK |         | #N/A        | #N/A        | #N/A        | 2.71807E-05 | #N/A        | #N/A        |
| PSB5_MOUSE     | AIYQATYR             |         | 0.000296865 | #N/A        | #N/A        | 0.000312951 | 1.5334E-05  | #N/A        |
| PSB5_MOUSE     | ATAGAYIASQTVK        |         | 0.000815297 | 8.46275E-05 | 0.000385207 | 0.000736374 | 3.72005E-05 | #N/A        |
| PSB5_MOUSE     | ATAGAYIASQTVKK       |         | 8.98101E-05 | #N/A        | 3.69066E-05 | 6.96445E-05 | #N/A        | 1.90161E-05 |
| PSB5_MOUSE     | DAYSGGAVNLYHVR       |         | 0.000541779 | 6.4077E-05  | 0.00035599  | 0.000582411 | 2.64475E-05 | 0.000165838 |
| PSB5_MOUSE     | LLANMVYQYK           |         | 3.90182E-05 | #N/A        | 4.09912E-05 | #N/A        | #N/A        | 2.9136E-05  |
| PSB5_MOUSE     | RAIYQATYR            |         | 0.000263312 | 3.65059E-05 | #N/A        | 0.00033412  | #N/A        | 0.000151112 |
| PSB5_MOUSE     | RGPGLYYVDSEGNR       |         | 4.99277E-05 | 3.45771E-05 | #N/A        | 0.00027164  | #N/A        | 0.000107678 |
| PSB5_MOUSE     | VEEAYDLAR            |         | 0.000557617 | 6.83152E-05 | 0.000370119 | 0.000515436 | 2.84859E-05 | 0.000221884 |
| PSB5_MOUSE     | VSSDNVADLHDK         |         | 0.000124458 | #N/A        | 8.5921E-05  | 0.000154341 | #N/A        | #N/A        |
| PSB5_MOUSE     | FLHGVIWAADSR         |         | #N/A        | 1.23892E-05 | 4.52352E-05 | #N/A        | #N/A        | #N/A        |
| PSB5_MOUSE     | GYSYDLK              |         | #N/A        | 2.0442E-05  | #N/A        | #N/A        | #N/A        | #N/A        |
| PSB5_MOUSE     | GPGLYYVDSEGNR        |         | #N/A        | #N/A        | 0.000282776 | 0.000520449 | #N/A        | #N/A        |
| PSB6_MOUSE     | DGSSGGVIR            |         | 0.000298001 | #N/A        | 0.000136688 | 0.000184119 | #N/A        | #N/A        |

| Dupl. Digest 1 | SwissProt ID   | Peptide | XICs        |             |             |             |             |             |
|----------------|----------------|---------|-------------|-------------|-------------|-------------|-------------|-------------|
|                |                |         | liver_corr  | spleen_corr | heart_corr  | kidney_corr | thymus_corr | lung_corr   |
| PSB6_MOUSE     | LAAIQESGVER    |         | 0.003217946 | 0.000641895 | 0.001936777 | 0.001991724 | 0.000937748 | 0.00160878  |
| PSB6_MOUSE     | QVLLGDQIPK     |         | 0.001774071 | #N/A        | #N/A        | 0.00154905  | 0.00058689  | #N/A        |
| PSB6_MOUSE     | TTTGSYIANR     |         | 0.001936319 | 0.000338099 | 0.000622556 | 0.001157856 | 0.000457309 | 0.000593413 |
| PSB6_MOUSE     | FTIATLPPP      |         | #N/A        | #N/A        | #N/A        | #N/A        | #N/A        | 0.000113437 |
| PSB7_MOUSE     | ATEGMVVADK     |         | 8.43098E-05 | #N/A        | 0.000131696 | 0.000136312 | #N/A        | #N/A        |
| PSB7_MOUSE     | ATEGMVVADKNCCK |         | 9.88191E-05 | 2.9554E-05  | 9.57445E-05 | #N/A        | 5.15802E-05 | 0.000111035 |
| PSB7_MOUSE     | DGIVLGADTR     |         | 0.000653526 | 0.000150834 | #N/A        | 0.000423784 | 0.000244334 | 0.00023963  |
| PSB7_MOUSE     | FRPDMEEEEAK    |         | 7.77322E-05 | 4.21926E-05 | 5.22042E-05 | 7.26706E-05 | 5.91338E-05 | 4.77752E-05 |
| PSB7_MOUSE     | FRPDMEEEEAKK   |         | 8.04704E-05 | #N/A        | #N/A        | 3.43637E-05 | #N/A        | #N/A        |
| PSB7_MOUSE     | GTTAVLTEK      |         | 0.001070832 | 0.000493296 | #N/A        | #N/A        | #N/A        | 0.000920283 |
| PSB7_MOUSE     | LDFLRPFVSNPK   |         | #N/A        | #N/A        | 9.31548E-05 | #N/A        | #N/A        | #N/A        |
| PSB8_MOUSE     | AIAYATHR       |         | 0.000295292 | 0.000357663 | 3.56953E-05 | 9.43885E-05 | 0.000402913 | 0.000259065 |
| PSB8_MOUSE     | ATAGSYSSLR     |         | 0.000574273 | 0.000402498 | #N/A        | 9.44165E-05 | 0.000482101 | 0.000170857 |
| PSB8_MOUSE     | KGPLYVDDNGTR   |         | 9.50385E-05 | 0.000132857 | 2.85518E-05 | 3.17242E-05 | #N/A        | 5.41503E-05 |
| PSB8_MOUSE     | QDLSPEEAYDLGR  |         | 0.000659623 | #N/A        | #N/A        | #N/A        | 0.001024329 | 0.000185367 |
| PSB8_MOUSE     | QDLSPEEAYDLGRR |         | 2.82321E-05 | 1.12308E-05 | #N/A        | #N/A        | #N/A        | #N/A        |
| PSB8_MOUSE     | RAIAYATHR      |         | 3.03217E-05 | #N/A        | #N/A        | 7.75676E-06 | 2.96574E-05 | 2.37349E-05 |
| PSB8_MOUSE     | VESSDVSDLLYK   |         | 0.000444278 | #N/A        | 5.21096E-05 | #N/A        | #N/A        | #N/A        |
| PSB8_MOUSE     | DNYSGGVNNMYHMK |         | #N/A        | 9.0285E-05  | #N/A        | #N/A        | 0.000122352 | 4.57389E-05 |
| PSB8_MOUSE     | GPGLYVDDNGTR   |         | #N/A        | 3.08247E-05 | #N/A        | #N/A        | #N/A        | #N/A        |
| PSB8_MOUSE     | ISVSAASK       |         | #N/A        | 0.000234556 | 1.04789E-05 | 5.71464E-05 | 0.000217229 | #N/A        |
| PSB8_MOUSE     | FQHGIVAVDSR    |         | #N/A        | #N/A        | #N/A        | 1.67182E-05 | #N/A        | #N/A        |
| PSB9_MOUSE     | VSAGTAVVNR     |         | 0.000402184 | 0.000382709 | 1.90937E-05 | #N/A        | 0.000259343 | 0.000104485 |

**Supplementary Table 5.** Corrected peptide XICs averaged per subunit in digest 1 (duplicate).

| Dupl. Digest 1 | Systematic | average XICs/subunit |                |                  |                 |                  |                 |
|----------------|------------|----------------------|----------------|------------------|-----------------|------------------|-----------------|
|                |            | Pept. ave spleen     | Pept. ave lung | Pept. ave thymus | Pept. ave heart | Pept. ave kidney | Pept. ave liver |
| PSA6_MOUSE     | $\alpha$ 1 | 0.000442856          | 0.000592667    | 0.000378666      | 0.000530049     | 0.000689702      | 0.000970828     |
| PSA2_MOUSE     | $\alpha$ 2 | 0.000192272          | 0.000151401    | 0.000195179      | 0.00035794      | 0.00039848       | 0.000401193     |
| PSA4_MOUSE     | $\alpha$ 3 | 0.000375934          | 0.00028947     | 0.000328199      | 0.000215504     | 0.000418189      | 0.000635391     |
| PSA7_MOUSE     | $\alpha$ 4 | 0.000384994          | 0.000303789    | 0.000458972      | 0.000531547     | 0.000343469      | 0.00056072      |
| PSA5_MOUSE     | $\alpha$ 5 | 0.000134535          | 0.000449164    | 0.000622703      | 0.000251611     | 0.000309035      | 0.000721524     |
| PSA1_MOUSE     | $\alpha$ 6 | 0.000242047          | 0.000245558    | 0.000173614      | 0.000326253     | 0.00040264       | 0.000422627     |
| PSA3_MOUSE     | $\alpha$ 7 | 0.000251206          | 0.000213111    | 0.000113548      | 0.000237852     | 0.000266954      | 0.000496702     |
| PSB6_MOUSE     | $\beta$ 1  | 0.000489997          | 0.000771877    | 0.000660649      | 0.000898674     | 0.001220687      | 0.001806584     |
| PSB9_MOUSE     | $\beta$ 1i | 0.000382709          | 0.000104485    | 0.000259343      | 1.90937E-05     | #DIV/0!          | 0.000402184     |
| PSB7_MOUSE     | $\beta$ 2  | 0.000178969          | 0.000329681    | 0.000118349      | 9.31999E-05     | 0.000166782      | 0.000344282     |
| PSB10_MOUSE    | $\beta$ 2i | 0.000403949          | 0.000389271    | 0.000434836      | #DIV/0!         | 0.000162584      | 0.000181559     |
| PSB3_MOUSE     | $\beta$ 3  | 1.16376E-05          | 3.47415E-05    | 3.33435E-05      | 3.87932E-05     | 3.06925E-05      | 0.000123832     |
| PSB2_MOUSE     | $\beta$ 4  | 0.000405327          | 0.000205067    | 0.00018171       | 0.000309818     | 0.000179853      | 0.000220276     |
| PSB5_MOUSE     | $\beta$ 5  | 4.58477E-05          | 0.000115777    | 2.6867E-05       | 0.000200393     | 0.000388596      | 0.000308676     |
| PSB8_MOUSE     | $\beta$ 5i | 0.000179988          | 0.000123152    | 0.000379764      | 3.17089E-05     | 5.03584E-05      | 0.000303866     |
| PSB1_MOUSE     | $\beta$ 6  | 0.0002361            | 0.000144992    | 0.000278726      | 0.000216702     | 0.000489652      | 0.000554679     |
| PSB4_MOUSE     | $\beta$ 7  | 0.000468228          | 0.000375392    | 0.000367445      | 0.000542276     | 0.000608242      | 0.00067887      |

**Supplementary Table 6.** Corrected peptide XICs for all subunits in digest 2.

| Digest 2     |                      | XICs        |             |             |             |             |             |
|--------------|----------------------|-------------|-------------|-------------|-------------|-------------|-------------|
| SwissProt ID | Peptide              | liver_corr  | spleen_corr | heart_corr  | kidney_corr | thymus_corr | lung_corr   |
| PSA1_MOUSE   | AMSIGAR              | 0.000258301 | 0.000122964 | 0.000148186 | 0.000194444 | 0.000279989 | 0.000233624 |
| PSA1_MOUSE   | AQSELAAHQK           | 0.000209413 | 7.62195E-05 | #N/A        | 0.000109942 | 0.000114452 | 0.000115555 |
| PSA1_MOUSE   | QECLDSR              |             | #N/A        | #N/A        | #N/A        | 7.75877E-05 | #N/A        |
| PSA1_MOUSE   | QGSATVGLK            | 0.000827814 | 0.000457935 | #N/A        | 0.000497513 | #N/A        | 0.000584383 |
| PSA1_MOUSE   | SKTHAVLVALKR         | 2.57933E-05 | #N/A        | #N/A        | #N/A        | 9.32039E-05 | 5.32391E-05 |
| PSA1_MOUSE   | THAVLVALKR           | 1.75147E-05 | #N/A        | #N/A        | #N/A        | 0.000194076 | #N/A        |
| PSA1_MOUSE   | TQIPTQR              | 0.00132624  | #N/A        | #N/A        | 0.00080145  | #N/A        | #N/A        |
| PSA1_MOUSE   | AQPSQAAEPAEKADPEMEH  | #N/A        | 0.000738349 | 0.001080709 | #N/A        | #N/A        | 0.001611471 |
| PSA1_MOUSE   | KAQPSQAAEPAEKADPEMEH | #N/A        | 0.000129573 | 0.000171718 | 2.01147E-05 | 0.000121747 | #N/A        |
| PSA1_MOUSE   | NVSIGIVGK            | #N/A        | 0.000604038 | 0.000390357 | 0.000605041 | #N/A        | #N/A        |
| PSA1_MOUSE   | LVSLIGSK             | #N/A        | #N/A        | #N/A        | 0.000743163 | #N/A        | 0.000786316 |
| PSA1_MOUSE   | RAQSELAAHQK          | #N/A        | #N/A        | #N/A        | 5.14207E-05 | 6.31058E-05 | 5.89666E-05 |
| PSA1_MOUSE   | THAVLVALK            | #N/A        | #N/A        | #N/A        | #N/A        | #N/A        | 6.12702E-05 |
| PSA1_MOUSE   | ETLPAEQDLTTK         | #N/A        | #N/A        | 0.001205674 | 0.001532959 | #N/A        | #N/A        |
| PSA1_MOUSE   | SKTHAVLVALK          | #N/A        | #N/A        | 2.38818E-05 | 3.22581E-05 | #N/A        | #N/A        |
| PSA1_MOUSE   | IHQIYAMEAVK          | #N/A        | #N/A        | #N/A        | 4.23321E-05 | #N/A        | #N/A        |
| PSA2_MOUSE   | AANGVVLATEKK         | 8.17576E-05 | #N/A        | #N/A        | 5.99453E-05 | 0.000124376 | 0.000140572 |
| PSA2_MOUSE   | GYSFLTTFSPSGK        | 1.91012E-05 | #N/A        | #N/A        | 7.33798E-05 | #N/A        | #N/A        |
| PSA2_MOUSE   | HIGLVYSGMGPDYR       | 2.89666E-05 | 1.90528E-05 | #N/A        | 3.67359E-05 | #N/A        | #N/A        |
| PSA2_MOUSE   | RLTPTEVR             | 0.000698733 | 0.000308784 | 0.000314961 | #N/A        | 0.000584266 | #N/A        |
| PSA2_MOUSE   | SILYDER              | 0.001003647 | #N/A        | #N/A        | #N/A        | #N/A        | #N/A        |
| PSA2_MOUSE   | SVHKVEPITK           | 0.000375614 | 0.000183964 | 0.000121204 | 0.000225332 | 0.000245736 | 0.000305658 |
| PSA2_MOUSE   | TFLEKR               | 0.000152159 | #N/A        | #N/A        | #N/A        | #N/A        | #N/A        |
| PSA2_MOUSE   | AANGVVLATEK          | #N/A        | #N/A        | #N/A        | #N/A        | 0.000420211 | #N/A        |
| PSA3_MOUSE   | AVENSSTAIGIR         | 0.001915616 | 0.001217768 | 0.000817794 | 0.001656533 | #N/A        | 0.001746409 |
| PSA3_MOUSE   | CKDGVVFGVEK          | 0.000136123 | 8.33581E-05 | #N/A        | 0.000181582 | 0.000185563 | 7.06772E-05 |
| PSA3_MOUSE   | DIREAEAK             | 0.000631525 | 0.00028744  | #N/A        | #N/A        | #N/A        | #N/A        |
| PSA3_MOUSE   | DIREAEAKYAK          | 4.30272E-05 | #N/A        | #N/A        | #N/A        | 0.000264634 | #N/A        |
| PSA3_MOUSE   | DVVKEVAK             | 0.000435772 | 0.000185717 | 0.000153882 | 0.000267357 | 0.000265697 | #N/A        |
| PSA3_MOUSE   | EEASNFR              | 0.000405447 | 0.000211472 | #N/A        | 0.000282436 | 0.000342439 | 0.000219615 |
| PSA3_MOUSE   | ESLKEEDESDDDNM       | 2.26898E-05 | #N/A        | #N/A        | 4.03646E-05 | #N/A        | #N/A        |
| PSA3_MOUSE   | IYIVHDEVKDK          | 5.61662E-05 | #N/A        | #N/A        | #N/A        | #N/A        | 5.42246E-05 |
| PSA3_MOUSE   | LFNVDR               | 0.000658976 | #N/A        | #N/A        | #N/A        | #N/A        | #N/A        |
| PSA3_MOUSE   | LYEESGSK             | 3.02874E-05 | 1.24801E-05 | #N/A        | 2.63688E-05 | #N/A        | #N/A        |
| PSA3_MOUSE   | LYEESGSKR            | 0.000229786 | 1.33766E-05 | #N/A        | 0.000121618 | 0.000126286 | #N/A        |
| PSA3_MOUSE   | SLADIAR              | 0.000332938 | #N/A        | #N/A        | #N/A        | #N/A        | 0.000287993 |
| PSA3_MOUSE   | TEIEKLQMK            | 1.22457E-05 | 3.48179E-05 | 1.91112E-05 | 3.25967E-05 | 6.17597E-05 | 3.24738E-05 |
| PSA3_MOUSE   | VFQVEYAMK            | 3.65778E-05 | #N/A        | 0.000192346 | #N/A        | #N/A        | 0.000514754 |
| PSA3_MOUSE   | HEIVPK               | #N/A        | 6.52031E-05 | 4.55345E-05 | 7.15507E-05 | 9.40645E-05 | 4.63455E-05 |
| PSA3_MOUSE   | IYIVHDEVK            | #N/A        | 8.39745E-06 | #N/A        | 1.86085E-05 | #N/A        | #N/A        |
| PSA3_MOUSE   | DGVVFGVEK            | #N/A        | #N/A        | #N/A        | #N/A        | #N/A        | 6.2268E-05  |
| PSA3_MOUSE   | RLFNVDK              | #N/A        | #N/A        | #N/A        | #N/A        | 2.61427E-05 | #N/A        |
| PSA3_MOUSE   | HVGMAVAGLLADAR       | #N/A        | #N/A        | #N/A        | 4.558E-06   | #N/A        | #N/A        |
| PSA3_MOUSE   | SNFGYNIPLK           | #N/A        | #N/A        | #N/A        | 0.000374084 | #N/A        | #N/A        |
| PSA4_MOUSE   | ATCIGNNSAAVSMK       | 3.60447E-05 | 0.000107005 | #N/A        | #N/A        | #N/A        | #N/A        |
| PSA4_MOUSE   | LLDEVFFSEK           | 0.000812104 | 0.000116397 | 0.000142788 | 0.000257546 | 0.000295185 | #N/A        |
| PSA4_MOUSE   | QAYTQFGGK            | 0.00058532  | #N/A        | #N/A        | #N/A        | 0.000213546 | 6.77715E-05 |
| PSA4_MOUSE   | QDYKEGEMTLK          | 0.000132262 | #N/A        | 3.11906E-05 | 6.67571E-05 | 8.83632E-05 | 5.45717E-05 |
| PSA4_MOUSE   | QKEVEQLIK            | 0.000104865 | 0.000127886 | #N/A        | 0.000137059 | #N/A        | #N/A        |
| PSA4_MOUSE   | TTIFSPGGR            | 0.001858132 | 0.001097064 | #N/A        | 0.001310964 | 0.001947922 | 0.001645709 |
| PSA4_MOUSE   | VEIATLTR             | 0.000222513 | #N/A        | 0.00013497  | 0.000336648 | #N/A        | 0.000168654 |
| PSA4_MOUSE   | SALALAVK             | #N/A        | 0.000292888 | #N/A        | #N/A        | 0.000406699 | 0.00023282  |
| PSA4_MOUSE   | KHEEEAKAER           | #N/A        | #N/A        | 3.76718E-05 | 3.21512E-05 | 4.33526E-05 | #N/A        |

| Digest 2    | SwissProt ID        | Peptide | XICs        |             |             |             |             |             |
|-------------|---------------------|---------|-------------|-------------|-------------|-------------|-------------|-------------|
|             |                     |         | liver_corr  | spleen_corr | heart_corr  | kidney_corr | thymus_corr | lung_corr   |
| PSA4_MOUSE  | LSAEKVEIATLTR       |         | #N/A        | #N/A        | #N/A        | #N/A        | 5.90606E-05 | #N/A        |
| PSA4_MOUSE  | EVEQLIK             |         | #N/A        | #N/A        | 0.000215684 | #N/A        | #N/A        | #N/A        |
| PSA4_MOUSE  | HEEEEEAKAER         |         | #N/A        | #N/A        | #N/A        | 4.48991E-06 | #N/A        | #N/A        |
| PSA5_MOUSE  | AIGSASEGAQSSLQEVYHK |         | 0.000527153 | #N/A        | 1.99159E-05 | 2.73502E-05 | #N/A        | #N/A        |
| PSA5_MOUSE  | TLIDKAR             |         | 2.37927E-05 | 1.31737E-05 | #N/A        | #N/A        | 1.6662E-05  | 2.3145E-05  |
| PSA5_MOUSE  | GVNTFSPEGR          |         | #N/A        | 0.000998146 | #N/A        | 0.00125451  | 0.001759597 | 0.001546895 |
| PSA5_MOUSE  | SEYDRGVNTFSPEGR     |         | #N/A        | #N/A        | #N/A        | #N/A        | 5.60978E-05 | #N/A        |
| PSA6_MOUSE  | AINQGGLTSVAVR       |         | 0.00095761  | 0.001588562 | #N/A        | 0.001955367 | 0.002312402 | #N/A        |
| PSA6_MOUSE  | ARYEAAHWK           |         | 8.68773E-05 | 4.08852E-05 | #N/A        | 5.43865E-05 | 5.61679E-05 | 4.34213E-05 |
| PSA6_MOUSE  | CDPAGYYCGFK         |         | 0.000249067 | 9.62165E-05 | 0.0001883   | 0.000321226 | 0.000198739 | 8.0566E-05  |
| PSA6_MOUSE  | DCAVIVTQK           |         | 0.000153792 | #N/A        | #N/A        | 7.05358E-05 | #N/A        | #N/A        |
| PSA6_MOUSE  | GKDCAVIVTQK         |         | 0.000633153 | 0.000227198 | 0.000224576 | 0.000414001 | 0.000419277 | 0.000202735 |
| PSA6_MOUSE  | GKDCAVIVTQKK        |         | 1.1924E-05  | #N/A        | #N/A        | #N/A        | #N/A        | #N/A        |
| PSA6_MOUSE  | GSSAGFDR            |         | 0.000214708 | 9.35417E-05 | 7.78931E-05 | 0.000125749 | 0.000158637 | 0.000135917 |
| PSA6_MOUSE  | HITIFSPPEGR         |         | 0.000984443 | 0.001062643 | #N/A        | #N/A        | 0.001372812 | 0.001257375 |
| PSA6_MOUSE  | LYQVEYAFK           |         | 0.000264948 | 0.000443649 | #N/A        | 0.000631608 | #N/A        | #N/A        |
| PSA6_MOUSE  | QTESTSFLEK          |         | 0.001354569 | 0.001006039 | 0.000787879 | 0.001422733 | 0.001874423 | #N/A        |
| PSA6_MOUSE  | YEAAHWK             |         | 0.000457336 | #N/A        | #N/A        | #N/A        | #N/A        | #N/A        |
| PSA6_MOUSE  | QTESTSFLEKK         |         | #N/A        | #N/A        | 4.03186E-05 | 2.91215E-05 | 4.86925E-05 | 6.95604E-05 |
| PSA6_MOUSE  | ITESIGCVMTGMTADSR   |         | #N/A        | #N/A        | #N/A        | 8.90196E-05 | 9.30123E-05 | #N/A        |
| PSA7_MOUSE  | ARVECQSHR           |         | 5.35805E-06 | #N/A        | #N/A        | #N/A        | #N/A        | #N/A        |
| PSA7_MOUSE  | GKDIVVLGVK          |         | 0.000119141 | 0.000495868 | 0.000220193 | 0.000576759 | #N/A        | 0.00055536  |
| PSA7_MOUSE  | GKDIVVLGVEKK        |         | 1.23947E-05 | 5.49092E-05 | #N/A        | 5.04243E-05 | 0.000123863 | #N/A        |
| PSA7_MOUSE  | GSTAVGVR            |         | 9.39261E-05 | #N/A        | #N/A        | 6.48479E-05 | #N/A        | #N/A        |
| PSA7_MOUSE  | KGSTAVGVR           |         | 2.35822E-05 | #N/A        | #N/A        | 1.69827E-05 | #N/A        | #N/A        |
| PSA7_MOUSE  | LYQTDPSGTYHAWK      |         | 0.000182115 | 5.41858E-05 | 0.000122903 | 9.29503E-05 | 0.000167724 | 0.00013079  |
| PSA7_MOUSE  | NIELAVMR            |         | 0.000272168 | 0.000177523 | #N/A        | 0.000242648 | 6.73109E-05 | #N/A        |
| PSA7_MOUSE  | NYTDDAIETDDLTIK     |         | 0.000383077 | 0.000403708 | #N/A        | 0.000759393 | 0.000504858 | #N/A        |
| PSA7_MOUSE  | YVAIEIEKEENEK       |         | 0.000614573 | #N/A        | #N/A        | #N/A        | 2.67206E-05 | 1.48008E-05 |
| PSA7_MOUSE  | ALLEVVQSGGK         |         | #N/A        | 0.001231154 | 0.001054449 | 0.001561162 | #N/A        | 0.001355323 |
| PSA7_MOUSE  | ILNPEEIEK           |         | #N/A        | #N/A        | #N/A        | #N/A        | 0.001387493 | #N/A        |
| PSA7_MOUSE  | DIVVLGVEKK          |         | #N/A        | #N/A        | #N/A        | 1.81332E-05 | #N/A        | #N/A        |
| PSB1_MOUSE  | DVFISAAER           |         | 0.000448703 | #N/A        | #N/A        | 0.000525089 | #N/A        | 0.000253548 |
| PSB1_MOUSE  | DVYTGDAALR          |         | 0.000770504 | #N/A        | #N/A        | #N/A        | #N/A        | #N/A        |
| PSB1_MOUSE  | EGIREETVPLR         |         | 1.27609E-05 | #N/A        | 1.66154E-05 | 2.65026E-05 | 3.09268E-05 | #N/A        |
| PSB1_MOUSE  | GAVYFDPVGSYQR       |         | 0.000181771 | 0.000136811 | 0.000117718 | 0.000252531 | 0.000141654 | #N/A        |
| PSB1_MOUSE  | ICIVTK              |         | 0.000202439 | #N/A        | #N/A        | 0.000258379 | #N/A        | #N/A        |
| PSB1_MOUSE  | LSEGSIHTR           |         | 0.000175046 | #N/A        | 0.00010254  | 0.000277576 | 0.000455893 | 0.000249348 |
| PSB1_MOUSE  | LVKDFVISAER         |         | #N/A        | 7.36327E-05 | #N/A        | #N/A        | #N/A        | #N/A        |
| PSB1_MOUSE  | NMQNVHEHVPLTLDR     |         | #N/A        | 2.60592E-05 | #N/A        | 1.75686E-05 | #N/A        | 0.000145733 |
| PSB10_MOUSE | ALSTPTEPVQR         |         | 0.000215026 | #N/A        | 7.89181E-05 | 0.000213197 | 0.001057601 | 0.000499211 |
| PSB10_MOUSE | ATNDSVVADK          |         | 4.3388E-05  | 0.000155408 | #N/A        | 3.68926E-05 | #N/A        | #N/A        |
| PSB10_MOUSE | DGVILGADTR          |         | 0.000109988 | #N/A        | #N/A        | 0.000109088 | #N/A        | #N/A        |
| PSB10_MOUSE | ATNDSVVADKCEK       |         | #N/A        | 3.36272E-05 | #N/A        | #N/A        | #N/A        | 2.51355E-05 |
| PSB10_MOUSE | IHFIAPK             |         | #N/A        | 5.97522E-05 | #N/A        | #N/A        | 9.48678E-05 | #N/A        |
| PSB10_MOUSE | MELHALSTGR          |         | #N/A        | 9.17532E-06 | #N/A        | #N/A        | #N/A        | #N/A        |
| PSB10_MOUSE | IYCCGAGVAADTEMTR    |         | #N/A        | #N/A        | #N/A        | #N/A        | 1.77145E-05 | #N/A        |
| PSB11_MOUSE | FRHGVIAAADTR        |         | #N/A        | #N/A        | #N/A        | #N/A        | 5.88143E-06 | #N/A        |
| PSB11_MOUSE | SDACVLYR            |         | #N/A        | #N/A        | #N/A        | #N/A        | 6.98968E-06 | #N/A        |
| PSB11_MOUSE | SSCGSYVACPASR       |         | #N/A        | #N/A        | #N/A        | #N/A        | 5.31566E-06 | #N/A        |
| PSB2_MOUSE  | AVELLR              |         | 6.65083E-05 | #N/A        | #N/A        | 7.55344E-05 | #N/A        | 4.8296E-05  |
| PSB2_MOUSE  | ERAVELLR            |         | 6.59585E-06 | #N/A        | #N/A        | #N/A        | #N/A        | #N/A        |
| PSB2_MOUSE  | KCLEELQK            |         | 4.86353E-05 | #N/A        | #N/A        | 4.59009E-05 | 3.04567E-05 | #N/A        |
| PSB2_MOUSE  | KCLEELQKR           |         | 2.27804E-05 | #N/A        | #N/A        | #N/A        | #N/A        | #N/A        |
| PSB2_MOUSE  | NGYELSPTAAANFTR     |         | 2.31554E-05 | #N/A        | #N/A        | 0.000256005 | #N/A        | #N/A        |



| Digest 2   | SwissProt ID      | Peptide | XICs        |             |             |             |             |             |
|------------|-------------------|---------|-------------|-------------|-------------|-------------|-------------|-------------|
|            |                   |         | liver_corr  | spleen_corr | heart_corr  | kidney_corr | thymus_corr | lung_corr   |
| PSB2_MOUSE | RNLADCLR          |         | 0.00014817  | #N/A        | #N/A        | 0.000246237 | 0.000349695 | 0.000274848 |
| PSB2_MOUSE | VAASNIVQMK        |         | 8.01562E-05 | 0.000262529 | #N/A        | 0.000277057 | 0.000155034 | 0.000167475 |
| PSB2_MOUSE | VAASNIVQMKDDHDK   |         | 7.34385E-05 | 5.08608E-05 | #N/A        | #N/A        | 0.000226915 | 0.000118212 |
| PSB2_MOUSE | YYTPTISR          |         | 0.000443769 | #N/A        | #N/A        | #N/A        | 0.000467143 | 0.000221748 |
| PSB2_MOUSE | AVELLRK           |         | #N/A        | 3.03372E-05 | #N/A        | 3.61024E-05 | #N/A        | #N/A        |
| PSB2_MOUSE | CLEELQK           |         | #N/A        | 1.73814E-05 | 2.78824E-05 | #N/A        | 3.80346E-05 | #N/A        |
| PSB2_MOUSE | NVQLYK            |         | #N/A        | 0.00027832  | 0.000168827 | 0.000304804 | 0.000439695 | 0.00033305  |
| PSB2_MOUSE | NLADCLR           |         | #N/A        | #N/A        | #N/A        | 0.000372858 | #N/A        | 0.000359037 |
| PSB2_MOUSE | DDHDKMFK          |         | #N/A        | #N/A        | #N/A        | 1.46471E-05 | #N/A        | #N/A        |
| PSB2_MOUSE | MRNGYELSPATAANFTR |         | #N/A        | #N/A        | #N/A        | 9.26535E-06 | #N/A        | #N/A        |
| PSB3_MOUSE | GKNCVAIAADR       |         | 5.07385E-05 | 2.17655E-05 | 1.19918E-05 | 4.74298E-05 | 3.86299E-05 | #N/A        |
| PSB3_MOUSE | NCVAIAADR         |         | 0.00013575  | #N/A        | #N/A        | #N/A        | #N/A        | #N/A        |
| PSB3_MOUSE | NCVAIAADRR        |         | 0.000123667 | #N/A        | #N/A        | 4.61387E-05 | 5.98194E-05 | #N/A        |
| PSB3_MOUSE | GKNCVAIAADRR      |         | #N/A        | 4.93697E-05 | 4.64674E-05 | #N/A        | 7.85779E-05 | 3.39335E-05 |
| PSB3_MOUSE | LNLVELK           |         | #N/A        | 0.000215038 | #N/A        | 0.000255389 | #N/A        | #N/A        |
| PSB4_MOUSE | EVLEKQPVLSQTEAR   |         | 8.08806E-05 | #N/A        | 0.000125381 | #N/A        | 4.94895E-05 | 0.000291939 |
| PSB4_MOUSE | FQIATVTEK         |         | 0.000783047 | 0.001044049 | 0.000310585 | 0.001077657 | 0.001087413 | 0.000756516 |
| PSB4_MOUSE | QPVLSQTEAR        |         | 0.001798642 | 0.000606506 | 0.000386529 | 0.000883614 | 0.001028713 | 0.000716941 |
| PSB4_MOUSE | FRNISR            |         | #N/A        | 4.35183E-06 | #N/A        | #N/A        | #N/A        | #N/A        |
| PSB4_MOUSE | AIHSWLTR          |         | #N/A        | #N/A        | #N/A        | 0.000108835 | 0.000120207 | 8.87888E-05 |
| PSB4_MOUSE | TQNPMTVTSVLGVK    |         | #N/A        | #N/A        | #N/A        | 0.000267353 | #N/A        | #N/A        |
| PSB5_MOUSE | AIYQATYR          |         | 0.000170457 | #N/A        | #N/A        | #N/A        | 2.15228E-05 | 0.000135686 |
| PSB5_MOUSE | ATAGAYIASQTVK     |         | 0.000489997 | 0.000111403 | 0.000350238 | 0.000793016 | 9.44634E-05 | 0.000417013 |
| PSB5_MOUSE | ATAGAYIASQTVKK    |         | 6.66474E-05 | #N/A        | 3.3379E-05  | 5.65276E-05 | #N/A        | 4.80432E-05 |
| PSB5_MOUSE | DAYS GGAVNLYHVR   |         | 8.96165E-05 | #N/A        | 0.000147905 | 0.000349105 | #N/A        | 0.000123765 |
| PSB5_MOUSE | LLANMVYQYK        |         | 5.58757E-05 | 1.20129E-05 | 6.38474E-05 | #N/A        | 1.22507E-05 | #N/A        |
| PSB5_MOUSE | RAIQATYR          |         | 0.000235226 | #N/A        | 0.000164597 | 0.000254752 | #N/A        | 0.00018852  |
| PSB5_MOUSE | RGPLYVDSEGNR      |         | 0.0001657   | #N/A        | 0.000147962 | 5.05322E-05 | 3.49308E-05 | #N/A        |
| PSB5_MOUSE | VEEAYDLAR         |         | 0.000391707 | #N/A        | 0.000320322 | 0.000540526 | 5.46991E-05 | #N/A        |
| PSB5_MOUSE | VSSDNVADLHDK      |         | 3.76498E-05 | #N/A        | #N/A        | 5.52351E-05 | #N/A        | 1.96896E-05 |
| PSB5_MOUSE | ISVAASK           |         | #N/A        | #N/A        | #N/A        | #N/A        | #N/A        | 0.000100637 |
| PSB5_MOUSE | FLHGIVVAADSR      |         | #N/A        | #N/A        | 3.09693E-05 | 6.36752E-05 | #N/A        | #N/A        |
| PSB5_MOUSE | RGPLYVDSEGNR      |         | #N/A        | #N/A        | 0.000146295 | 0.000352843 | #N/A        | #N/A        |
| PSB6_MOUSE | DGSSGGVIR         |         | 0.000221875 | #N/A        | 9.95617E-05 | 0.000158378 | 0.000119885 | #N/A        |
| PSB6_MOUSE | EMCYR             |         | 4.99235E-06 | #N/A        | #N/A        | #N/A        | #N/A        | #N/A        |
| PSB6_MOUSE | LAAIQESGVER       |         | 0.001629609 | 3.11726E-05 | 0.001092699 | 0.001565354 | 0.001497328 | 0.001701777 |
| PSB6_MOUSE | TTGSIYANR         |         | 0.001713198 | 0.00032984  | 0.00043374  | 0.000975746 | 0.00076742  | 0.000835647 |
| PSB6_MOUSE | QVLLGDQIPK        |         | #N/A        | #N/A        | #N/A        | 0.001092488 | #N/A        | 0.000885593 |
| PSB6_MOUSE | FTIATLPPP         |         | #N/A        | #N/A        | #N/A        | 0.000107497 | #N/A        | #N/A        |
| PSB7_MOUSE | ATEGMVVADK        |         | 0.000283062 | 6.82276E-05 | #N/A        | 0.000219967 | 0.00019046  | #N/A        |
| PSB7_MOUSE | DGIVLGADTR        |         | 0.000662162 | 0.000209824 | #N/A        | 0.000545013 | 0.000516916 | #N/A        |
| PSB7_MOUSE | FRPDMEEEAK        |         | 0.000200323 | #N/A        | #N/A        | 0.000100738 | 0.000103109 | #N/A        |
| PSB7_MOUSE | FRPDMEEEAKK       |         | 7.92157E-05 | 5.65036E-05 | #N/A        | 0.000117345 | #N/A        | 8.93535E-05 |
| PSB7_MOUSE | GTTAVLTEK         |         | 0.001040779 | 0.000318728 | 0.000538951 | 0.000699727 | 0.000806978 | 0.00086867  |
| PSB7_MOUSE | ATEGMVVADKNCCK    |         | #N/A        | 8.63744E-05 | 0.000199373 | 0.000249541 | 0.000186301 | 0.000142406 |
| PSB7_MOUSE | QMLFR             |         | #N/A        | #N/A        | #N/A        | #N/A        | 7.14986E-06 | #N/A        |
| PSB8_MOUSE | AIAYATHR          |         | 0.000288158 | 0.000272259 | 1.89139E-05 | 7.01388E-05 | 0.000440786 | 0.000224052 |
| PSB8_MOUSE | ATAGSYISSLR       |         | 0.000195014 | 0.000621972 | #N/A        | 8.62192E-05 | 0.00079464  | 0.000271518 |
| PSB8_MOUSE | DNYSGGVVMYHMK     |         | 1.80587E-05 | 4.0867E-05  | #N/A        | 1.57892E-05 | #N/A        | #N/A        |
| PSB8_MOUSE | GPGLYVDDNGTR      |         | 2.22705E-05 | #N/A        | #N/A        | #N/A        | 7.41937E-05 | #N/A        |
| PSB8_MOUSE | RAIAYATHR         |         | 3.16321E-05 | 2.57034E-05 | #N/A        | #N/A        | 3.46609E-05 | 2.3837E-05  |
| PSB8_MOUSE | KGPGLYVDDNGTR     |         | #N/A        | 3.97375E-05 | #N/A        | 6.68292E-05 | 6.7527E-05  | 2.51746E-05 |
| PSB8_MOUSE | VESSDVSDLLYK      |         | #N/A        | 0.000555526 | #N/A        | 0.000161022 | #N/A        | #N/A        |
| PSB8_MOUSE | QDLSPEEAYDLGR     |         | #N/A        | #N/A        | #N/A        | 8.94136E-05 | #N/A        | 8.31347E-05 |
| PSB8_MOUSE | FQHGIVAVDSR       |         | #N/A        | #N/A        | #N/A        | #N/A        | 0.000119199 | #N/A        |

| Digest 2     |              | XICs        |             |             |             |             |           |
|--------------|--------------|-------------|-------------|-------------|-------------|-------------|-----------|
| SwissProt ID | Peptide      | liver_corr  | spleen_corr | heart_corr  | kidney_corr | thymus_corr | lung_corr |
| PSB8_MOUSE   | ISVSAASK     | #N/A        | #N/A        | 7.53634E-06 | #N/A        | #N/A        | #N/A      |
| PSB9_MOUSE   | FTTNAITLAMNR | 1.47458E-05 | #N/A        | #N/A        | 9.22203E-06 | #N/A        | #N/A      |
| PSB9_MOUSE   | VSAGTAVVNR   | 0.00028504  | 0.000434773 | #N/A        | #N/A        | 0.000515067 | #N/A      |

**Supplementary Table 7.** Corrected peptide XICs averaged per subunit in digest 2.

| Digest 2     |            | average XICs/subunit |                |                  |                 |                  |                 |
|--------------|------------|----------------------|----------------|------------------|-----------------|------------------|-----------------|
| SwissProt ID | Systematic | Pept. ave spleen     | Pept. ave lung | Pept. ave thymus | Pept. ave heart | Pept. ave kidney | Pept. ave liver |
| PSA6_MOUSE   | α1         | 0.000569842          | 0.000298262    | 0.000726018      | 0.000263794     | 0.000511375      | 0.000488039     |
| PSA2_MOUSE   | α2         | 0.0001706            | 0.000223115    | 0.000343647      | 0.000218083     | 9.88483E-05      | 0.00033714      |
| PSA4_MOUSE   | α3         | 0.000348248          | 0.000433905    | 0.000436304      | 0.000112461     | 0.000306517      | 0.000535891     |
| PSA7_MOUSE   | α4         | 0.000402891          | 0.000514068    | 0.000379662      | 0.000465848     | 0.000375922      | 0.000189593     |
| PSA5_MOUSE   | α5         | 0.00050566           | 0.00078502     | 0.000610786      | 1.99159E-05     | 0.00064093       | 0.000275473     |
| PSA1_MOUSE   | α6         | 0.000354846          | 0.000438103    | 0.00013488       | 0.000503421     | 0.000420967      | 0.000380725     |
| PSA3_MOUSE   | α7         | 0.000212003          | 0.000337195    | 0.000170823      | 0.000245733     | 0.000256471      | 0.00035337      |
| PSB6_MOUSE   | β1         | 0.000180506          | 0.001141006    | 0.000794878      | 0.000542        | 0.000779893      | 0.000892419     |
| PSB9_MOUSE   | β1i        | 0.000434773          | #DIV/0!        | 0.000515067      | #DIV/0!         | 9.22203E-06      | 0.000149893     |
| PSB7_MOUSE   | β2         | 0.000147931          | 0.00036681     | 0.000301819      | 0.000369162     | 0.000322055      | 0.000453108     |
| PSB10_MOUSE  | β2i        | 6.44906E-05          | 0.000262173    | 0.000390061      | 7.89181E-05     | 0.000119726      | 0.000122801     |
| PSB3_MOUSE   | β3         | 9.53911E-05          | 3.39335E-05    | 5.90091E-05      | 2.92296E-05     | 0.000116319      | 0.000103385     |
| PSB2_MOUSE   | β4         | 0.000127886          | 0.000217524    | 0.000243853      | 9.83547E-05     | 0.000163841      | 0.000101468     |
| PSB5_MOUSE   | β5         | 6.1708E-05           | 0.000147622    | 4.35733E-05      | 0.000156168     | 0.000279579      | 0.000189209     |
| PSB8_MOUSE   | β5i        | 0.000259344          | 0.000125543    | 0.000255168      | 1.32251E-05     | 8.15686E-05      | 0.000111027     |
| PSB1_MOUSE   | β6         | 7.88342E-05          | 0.00021621     | 0.000209491      | 7.89575E-05     | 0.000226275      | 0.000298537     |
| PSB4_MOUSE   | β7         | 0.000551636          | 0.000463546    | 0.000571456      | 0.000274165     | 0.000584365      | 0.000887523     |
| PSB11_MOUSE  | β5t        | #DIV/0!              | #DIV/0!        | 6.06226E-06      | #DIV/0!         | #DIV/0!          | #DIV/0!         |

**Supplementary Table 8.** Corrected peptide XICs for all subunits in digest 2 (duplicate).

| Dupl. Digest 2 |                      | XICs        |             |             |             |             |             |
|----------------|----------------------|-------------|-------------|-------------|-------------|-------------|-------------|
| SwissProt ID   | Peptide              | liver_corr  | spleen_corr | heart_corr  | kidney_corr | thymus_corr | lung_corr   |
| PSA1_MOUSE     | AMSIGAR              | 3.88421E-05 | #N/A        | 0.000127239 | 0.00017407  | 0.000283815 | 0.000229901 |
| PSA1_MOUSE     | AQPSQAAEPAEK         | 0.000349798 | #N/A        | #N/A        | #N/A        | #N/A        | 0.000120552 |
| PSA1_MOUSE     | AQSELAHQK            | 0.000230313 | 0.00010896  | #N/A        | 0.000145164 | 0.000167473 | #N/A        |
| PSA1_MOUSE     | ETLPAEQDLTTK         | 0.002451835 | 0.001313624 | #N/A        | 0.001446462 | #N/A        | 0.001061637 |
| PSA1_MOUSE     | NVSIQVIGK            | 0.000899347 | #N/A        | 0.000412767 | #N/A        | #N/A        | #N/A        |
| PSA1_MOUSE     | QGSATVGLK            | 0.000810417 | #N/A        | #N/A        | 0.000398064 | #N/A        | #N/A        |
| PSA1_MOUSE     | RAQSELAHQK           | 9.05828E-05 | 3.73834E-05 | #N/A        | 4.68676E-05 | 5.81104E-05 | 4.55128E-05 |
| PSA1_MOUSE     | THAVLVALK            | 0.000113632 | #N/A        | 3.64685E-05 | #N/A        | 0.000130837 | 6.78731E-05 |
| PSA1_MOUSE     | TQIPTQR              | 0.001354821 | #N/A        | #N/A        | #N/A        | #N/A        | #N/A        |
| PSA1_MOUSE     | AQPSQAAEPAEKADPEMEH  | #N/A        | 0.000774536 | 0.000164659 | 0.000149676 | 0.000185552 | 0.000148229 |
| PSA1_MOUSE     | KAQPSQAAEPAEKADPEMEH | #N/A        | 0.000108207 | 0.000219785 | 1.86784E-05 | 0.000180351 | 0.000137484 |
| PSA1_MOUSE     | SKTHAVLVALK          | #N/A        | 5.11345E-05 | 2.10371E-05 | 6.94099E-05 | 8.94916E-05 | 4.18964E-05 |
| PSA1_MOUSE     | THAVLVALKR           | #N/A        | 0.000117832 | 7.66057E-05 | 0.000147337 | 0.000102163 | 0.000177271 |
| PSA1_MOUSE     | LVSLIGSK             | #N/A        | #N/A        | #N/A        | 0.000744938 | 0.001021609 | 0.000754434 |
| PSA1_MOUSE     | SKTHAVLVALKR         | #N/A        | #N/A        | #N/A        | 4.59183E-05 | #N/A        | 7.39334E-05 |
| PSA1_MOUSE     | LLCNFMR              | #N/A        | #N/A        | 9.19671E-05 | 8.87745E-05 | #N/A        | #N/A        |
| PSA1_MOUSE     | QECLDSR              | #N/A        | #N/A        | #N/A        | 0.00010516  | #N/A        | #N/A        |
| PSA2_MOUSE     | AANGVVLATEKK         | 7.7074E-05  | #N/A        | #N/A        | 9.26496E-05 | #N/A        | #N/A        |
| PSA2_MOUSE     | HIGLVYSGMGPDYR       | 2.19974E-05 | #N/A        | #N/A        | 3.39479E-05 | #N/A        | 2.8279E-05  |
| PSA2_MOUSE     | QKSILYDER            | 4.29334E-06 | #N/A        | #N/A        | #N/A        | #N/A        | #N/A        |
| PSA2_MOUSE     | RLTPTEVR             | 0.00059895  | #N/A        | #N/A        | 0.000414202 | 0.000499937 | 0.000392304 |

| Dupl. Digest 2 | SwissProt ID          | Peptide | XICs        |             |             |             |             |             |
|----------------|-----------------------|---------|-------------|-------------|-------------|-------------|-------------|-------------|
|                |                       |         | liver_corr  | spleen_corr | heart_corr  | kidney_corr | thymus_corr | lung_corr   |
| PSA2_MOUSE     | SVHKVEPITK            |         | 0.000304757 | 0.000144672 | 0.000112259 | 0.00018837  | 0.000550966 | 0.000242422 |
| PSA2_MOUSE     | TFLEKR                |         | 0.0001383   | 3.22795E-05 | #N/A        | 3.2224E-05  | #N/A        | #N/A        |
| PSA2_MOUSE     | SILYDER               |         | #N/A        | 0.000597526 | #N/A        | 0.000756977 | #N/A        | 0.000595229 |
| PSA2_MOUSE     | AANGVVLATEK           |         | #N/A        | #N/A        | 0.000145455 | #N/A        | #N/A        | #N/A        |
| PSA2_MOUSE     | LVQIEYALAAVAGGAPSVGIK |         | #N/A        | #N/A        | #N/A        | 0.000128498 | #N/A        | #N/A        |
| PSA2_MOUSE     | YNEDLELEDAIHTAILTK    |         | #N/A        | #N/A        | #N/A        | 9.19272E-05 | #N/A        | #N/A        |
| PSA3_MOUSE     | AVENSSTAIGIR          |         | 0.002613064 | 0.001147669 | 0.000594509 | 0.001383093 | #N/A        | 0.001559283 |
| PSA3_MOUSE     | CKDGVVFGVEK           |         | 0.000224729 | 7.97329E-05 | 6.14215E-05 | 0.000155471 | 0.000174204 | 6.12972E-05 |
| PSA3_MOUSE     | DGVVFGVEK             |         | 0.00016927  | 5.10175E-05 | #N/A        | 7.94249E-05 | 9.70824E-05 | #N/A        |
| PSA3_MOUSE     | DIREEAKEYAK           |         | 6.28421E-05 | #N/A        | #N/A        | #N/A        | 5.41533E-05 | 6.39212E-05 |
| PSA3_MOUSE     | DVVKEVAK              |         | 0.000388002 | 0.000171713 | 0.000148727 | 0.000231465 | 0.000265215 | 0.000209448 |
| PSA3_MOUSE     | EEASNFR               |         | 0.000602693 | 0.000238802 | 0.000115969 | 0.000339587 | 0.000399473 | 0.000238196 |
| PSA3_MOUSE     | ESLKEEDESDDDNM        |         | 5.447E-05   | 5.10088E-05 | #N/A        | #N/A        | 0.000237096 | #N/A        |
| PSA3_MOUSE     | LFNVDR                |         | 0.00073108  | 0.000386367 | #N/A        | 0.000440097 | 0.000687337 | #N/A        |
| PSA3_MOUSE     | LYEESGSK              |         | 3.45865E-05 | #N/A        | 1.17014E-05 | 3.59445E-05 | 3.33427E-05 | #N/A        |
| PSA3_MOUSE     | RLFNVDR               |         | 2.63955E-05 | #N/A        | #N/A        | 1.86387E-05 | 2.66355E-05 | 1.45782E-05 |
| PSA3_MOUSE     | SLADIAR               |         | 0.000505663 | #N/A        | #N/A        | #N/A        | #N/A        | #N/A        |
| PSA3_MOUSE     | TEIEKLQMK             |         | 6.17035E-05 | 3.81494E-05 | 3.21315E-05 | 4.14988E-05 | 6.41353E-05 | #N/A        |
| PSA3_MOUSE     | LYEESGSKR             |         | #N/A        | 0.000108053 | #N/A        | 0.000155601 | 0.000192256 | #N/A        |
| PSA3_MOUSE     | VFQVEYAMK             |         | #N/A        | 0.000148971 | 4.23654E-05 | #N/A        | #N/A        | 0.000195059 |
| PSA3_MOUSE     | DIREEAEK              |         | #N/A        | #N/A        | 0.000210458 | #N/A        | #N/A        | 0.000305328 |
| PSA3_MOUSE     | HEIVPK                |         | #N/A        | #N/A        | 3.67272E-05 | 7.43307E-05 | 9.75907E-05 | 4.08611E-05 |
| PSA3_MOUSE     | IYIVHDEVKDK           |         | #N/A        | #N/A        | 4.25247E-05 | #N/A        | 6.3665E-05  | #N/A        |
| PSA3_MOUSE     | IYIVHDEVK             |         | #N/A        | #N/A        | 1.32998E-05 | #N/A        | #N/A        | #N/A        |
| PSA4_MOUSE     | EVEQLIKK              |         | 2.53275E-05 | 1.00165E-05 | #N/A        | #N/A        | #N/A        | #N/A        |
| PSA4_MOUSE     | QAYTQFGGK             |         | 0.0006091   | #N/A        | #N/A        | 0.000184935 | 0.000197309 | #N/A        |
| PSA4_MOUSE     | QDYKEGEMTLK           |         | 0.000116959 | 3.99131E-05 | 4.69842E-05 | 6.80522E-05 | 0.00010185  | 4.99855E-05 |
| PSA4_MOUSE     | TTIFSPGR              |         | 0.001644602 | 0.000681939 | 0.000540969 | 0.001272814 | 0.001822836 | 0.001109209 |
| PSA4_MOUSE     | VEIATLTR              |         | 0.000443155 | 0.00017153  | 0.00013087  | 0.000292173 | #N/A        | #N/A        |
| PSA4_MOUSE     | ATCIGNNSAAAVSMLK      |         | #N/A        | #N/A        | 5.09132E-05 | #N/A        | #N/A        | 4.31492E-05 |
| PSA4_MOUSE     | EVEQLIK               |         | #N/A        | #N/A        | #N/A        | #N/A        | #N/A        | 0.000229993 |
| PSA4_MOUSE     | LLDEVFFSEK            |         | #N/A        | #N/A        | 0.000200622 | #N/A        | #N/A        | 0.000284443 |
| PSA4_MOUSE     | SALALAVK              |         | #N/A        | #N/A        | #N/A        | 0.000303788 | #N/A        | 0.000238821 |
| PSA4_MOUSE     | LSAEKVEIATLTR         |         | #N/A        | #N/A        | 0.000167895 | #N/A        | 0.000402403 | #N/A        |
| PSA5_MOUSE     | ELEEVIK               |         | 0.000108926 | #N/A        | #N/A        | #N/A        | #N/A        | #N/A        |
| PSA5_MOUSE     | GPQLFHMDSPTGTFVQCDAR  |         | 0.000426227 | 4.83278E-05 | 8.62291E-05 | 0.000151196 | 6.27386E-05 | #N/A        |
| PSA5_MOUSE     | GVNTFSPEGR            |         | 0.002074748 | 0.000981353 | 0.000548754 | 0.001069697 | #N/A        | 0.001473783 |
| PSA5_MOUSE     | TLIDKAR               |         | 2.47078E-05 | #N/A        | 1.10641E-05 | 1.28664E-05 | 1.54079E-05 | #N/A        |
| PSA5_MOUSE     | AIGSASEGAQSSLQEVYHK   |         | #N/A        | 4.96847E-05 | 0.000108895 | #N/A        | 0.000130076 | 8.94152E-05 |
| PSA5_MOUSE     | RITSPLMEPSSIEK        |         | #N/A        | 4.42672E-05 | #N/A        | 4.64456E-05 | 6.39703E-05 | 3.63501E-05 |
| PSA5_MOUSE     | SEYDRGVNTFSPEGR       |         | #N/A        | #N/A        | #N/A        | 2.2143E-05  | 5.60738E-05 | #N/A        |
| PSA5_MOUSE     | LFQVEYAIEAIK          |         | #N/A        | #N/A        | #N/A        | 0.000161116 | #N/A        | #N/A        |
| PSA6_MOUSE     | AINQGGTSTVAVR         |         | 0.0022643   | #N/A        | #N/A        | 0.002007092 | 0.002785589 | 0.001781465 |
| PSA6_MOUSE     | ARYEAANWK             |         | 0.000111152 | 3.54478E-05 | 2.28087E-05 | #N/A        | 5.98384E-05 | 4.50138E-05 |
| PSA6_MOUSE     | CDPAGYCGFK            |         | 0.000312379 | 7.22484E-05 | 0.00012954  | 0.000350859 | #N/A        | 5.46989E-05 |
| PSA6_MOUSE     | GKDCAVIVTQK           |         | 0.000681612 | 0.000214853 | 0.000243897 | 0.000429793 | 0.000399748 | 0.000182451 |
| PSA6_MOUSE     | GSSAGFDR              |         | 0.000194586 | 0.000108027 | 0.000101777 | 0.00015523  | 0.000173846 | 0.000145807 |
| PSA6_MOUSE     | LYQVEYAFK             |         | 0.000983922 | #N/A        | #N/A        | 0.000903283 | 0.001230583 | 0.000689518 |
| PSA6_MOUSE     | QTESTSFLEK            |         | 0.001886417 | 0.000927167 | 0.000509262 | 0.001100991 | 0.001639095 | 0.00083259  |
| PSA6_MOUSE     | QTESTSFLEKK           |         | 0.000119503 | 2.64823E-05 | 3.23504E-05 | 3.377E-05   | 5.51301E-05 | 5.68728E-05 |
| PSA6_MOUSE     | HITIFSPGR             |         | #N/A        | 0.000780252 | 0.000604996 | 0.001407103 | #N/A        | #N/A        |
| PSA6_MOUSE     | ITESIGCVMTGMTADSR     |         | #N/A        | 0.000126864 | 9.26776E-05 | #N/A        | #N/A        | #N/A        |
| PSA6_MOUSE     | DCAVIVTQK             |         | #N/A        | #N/A        | #N/A        | 6.94773E-05 | #N/A        | #N/A        |
| PSA6_MOUSE     | ILTEAIDAHLVALAERD     |         | #N/A        | #N/A        | #N/A        | 0.000194473 | #N/A        | #N/A        |
| PSA6_MOUSE     | YEAANWK               |         | #N/A        | #N/A        | #N/A        | 0.000304768 | #N/A        | #N/A        |

| Dupl. Digest 2 | SwissProt ID         | Peptide | XICs        |             |             |             |             |             |
|----------------|----------------------|---------|-------------|-------------|-------------|-------------|-------------|-------------|
|                |                      |         | liver_corr  | spleen_corr | heart_corr  | kidney_corr | thymus_corr | lung_corr   |
| PSA7_MOUSE     | GKDIVVLGVEKK         |         | 7.81291E-05 | 6.87364E-05 | 5.38058E-05 | 6.89799E-05 | 0.000147397 | 0.000151746 |
| PSA7_MOUSE     | GSTAVGVR             |         | 8.46618E-05 | 6.0943E-05  | #N/A        | #N/A        | #N/A        | 9.89085E-05 |
| PSA7_MOUSE     | LYQTDPSGTYHAWK       |         | 0.000218253 | 8.27329E-05 | 0.000158982 | 4.97379E-05 | 7.60317E-05 | 8.18849E-05 |
| PSA7_MOUSE     | NYTDDAIETDDLTIK      |         | 0.001919249 | #N/A        | 0.001170354 | #N/A        | 0.002047048 | #N/A        |
| PSA7_MOUSE     | YVAEIEKEK            |         | 9.49255E-06 | #N/A        | #N/A        | #N/A        | #N/A        | #N/A        |
| PSA7_MOUSE     | YVAEIEKEEENEK        |         | 7.73161E-05 | 0.000470894 | 0.000462493 | 3.32914E-05 | #N/A        | 0.000542024 |
| PSA7_MOUSE     | DIVVLGVEKK           |         | #N/A        | 1.41414E-05 | #N/A        | #N/A        | 2.82216E-05 | #N/A        |
| PSA7_MOUSE     | GKDIVVLGVEK          |         | #N/A        | 0.000468362 | 0.000351745 | 0.000589216 | #N/A        | 0.000507086 |
| PSA7_MOUSE     | NIELAVMR             |         | #N/A        | 0.000152351 | 4.68259E-05 | #N/A        | 0.000292778 | 0.000124622 |
| PSA7_MOUSE     | KGSTAVGVR            |         | #N/A        | #N/A        | #N/A        | 1.71897E-05 | #N/A        | 3.06577E-05 |
| PSA7_MOUSE     | SVREFLEK             |         | #N/A        | #N/A        | #N/A        | #N/A        | 1.34354E-05 | 1.86748E-05 |
| PSA7_MOUSE     | ILNPEEIEK            |         | #N/A        | #N/A        | #N/A        | #N/A        | 0.001459801 | #N/A        |
| PSA7_MOUSE     | ALLEVVQSGGK          |         | #N/A        | #N/A        | #N/A        | 0.001678903 | #N/A        | #N/A        |
| PSB1_MOUSE     | AGGSASAMLQPLLDNQVGFK |         | 7.93285E-05 | #N/A        | #N/A        | 0.00018919  | #N/A        | #N/A        |
| PSB1_MOUSE     | EGIREETVPLR          |         | 3.72386E-05 | #N/A        | #N/A        | 2.28829E-05 | #N/A        | #N/A        |
| PSB1_MOUSE     | ICIVTK               |         | 0.000404658 | #N/A        | #N/A        | 0.000236985 | #N/A        | #N/A        |
| PSB1_MOUSE     | LSEGSIHTR            |         | 0.000383911 | 0.000232222 | 0.000188988 | 0.000273166 | 0.000444294 | 0.000281075 |
| PSB1_MOUSE     | TVIGCSGFHGDCLTLTK    |         | 1.43459E-05 | #N/A        | #N/A        | #N/A        | #N/A        | #N/A        |
| PSB1_MOUSE     | DVFISAAER            |         | #N/A        | 0.000257327 | 0.000175043 | 0.000502617 | 0.000515032 | 0.000169656 |
| PSB1_MOUSE     | GAVYSFDPVGSYQR       |         | #N/A        | 0.000291771 | 0.000293243 | 0.00050097  | 0.000514603 | 0.000158751 |
| PSB1_MOUSE     | LVKDFVISAER          |         | #N/A        | 9.93677E-05 | #N/A        | #N/A        | #N/A        | 9.60728E-05 |
| PSB1_MOUSE     | DVYTGDALR            |         | #N/A        | #N/A        | 0.00029792  | 0.000603267 | 0.000690075 | 0.000271632 |
| PSB1_MOUSE     | NMQNVEHVPLTLDR       |         | #N/A        | #N/A        | #N/A        | #N/A        | #N/A        | 0.000157186 |
| PSB1_MOUSE     | DVFISAAERDVYTGDALR   |         | #N/A        | #N/A        | #N/A        | 1.41769E-05 | #N/A        | #N/A        |
| PSB10_MOUSE    | ALSTPTEPVQR          |         | 0.000245129 | #N/A        | #N/A        | 0.000205969 | 0.001061107 | #N/A        |
| PSB10_MOUSE    | ATNDSVVADK           |         | 5.59522E-05 | 0.000159971 | #N/A        | 4.29483E-05 | #N/A        | #N/A        |
| PSB10_MOUSE    | ATNDSVVADKSCCK       |         | #N/A        | 3.38142E-05 | #N/A        | #N/A        | 3.35468E-05 | #N/A        |
| PSB10_MOUSE    | MELHALSTGR           |         | #N/A        | 1.0981E-05  | #N/A        | #N/A        | #N/A        | #N/A        |
| PSB10_MOUSE    | DGVILGADTR           |         | #N/A        | #N/A        | 2.31951E-05 | 9.08307E-05 | #N/A        | 0.000176118 |
| PSB10_MOUSE    | IHFIAPK              |         | #N/A        | #N/A        | #N/A        | #N/A        | #N/A        | 3.74019E-05 |
| PSB10_MOUSE    | FAPGTTPLVLR          |         | #N/A        | #N/A        | 5.76923E-05 | #N/A        | 0.000925705 | #N/A        |
| PSB10_MOUSE    | IYCCGAGVAADTEMTR     |         | #N/A        | #N/A        | #N/A        | #N/A        | 3.951E-05   | #N/A        |
| PSB2_MOUSE     | AVELLR               |         | 8.2383E-05  | #N/A        | 2.41913E-05 | 7.57781E-05 | 8.58563E-05 | #N/A        |
| PSB2_MOUSE     | ERAVELLR             |         | 1.26327E-05 | #N/A        | #N/A        | 7.93962E-06 | 8.5295E-06  | #N/A        |
| PSB2_MOUSE     | ERAVELLRK            |         | 1.6253E-05  | #N/A        | #N/A        | #N/A        | #N/A        | 1.37219E-05 |
| PSB2_MOUSE     | KCLEELQK             |         | 4.59202E-05 | #N/A        | 1.94322E-05 | 4.98999E-05 | #N/A        | #N/A        |
| PSB2_MOUSE     | KCLEELQKR            |         | 1.6153E-05  | #N/A        | #N/A        | 1.02833E-05 | #N/A        | #N/A        |
| PSB2_MOUSE     | NVQLYK               |         | 2.71392E-05 | 0.000265098 | #N/A        | 0.000276342 | #N/A        | #N/A        |
| PSB2_MOUSE     | VAASNIVQMK           |         | 0.000314326 | #N/A        | 0.000123258 | 0.000259194 | 0.000480862 | 0.000178719 |
| PSB2_MOUSE     | VAASNIVQMKDDHDK      |         | 0.000118555 | #N/A        | 4.20035E-05 | 0.000113096 | #N/A        | #N/A        |
| PSB2_MOUSE     | YYTPTISR             |         | 0.000509515 | #N/A        | #N/A        | #N/A        | #N/A        | 0.000127662 |
| PSB2_MOUSE     | MRNGYELSPTAAANFTR    |         | #N/A        | 2.88549E-05 | #N/A        | 8.09481E-05 | 7.30814E-05 | 3.08502E-05 |
| PSB2_MOUSE     | NGYELSPTAAANFTR      |         | #N/A        | 0.000299726 | #N/A        | #N/A        | #N/A        | #N/A        |
| PSB2_MOUSE     | NLADCLR              |         | #N/A        | 0.000207028 | #N/A        | 0.000342695 | #N/A        | 0.000288328 |
| PSB2_MOUSE     | RNLADCLR             |         | #N/A        | 0.000150947 | #N/A        | 0.000239143 | 0.000340719 | 0.000268543 |
| PSB2_MOUSE     | AVELLRK              |         | #N/A        | #N/A        | #N/A        | #N/A        | 5.11243E-05 | #N/A        |
| PSB2_MOUSE     | CLEELQK              |         | #N/A        | #N/A        | #N/A        | 5.6254E-05  | 3.65991E-05 | #N/A        |
| PSB3_MOUSE     | GKNCAIAADR           |         | 6.39021E-05 | 1.62072E-05 | #N/A        | 4.0252E-05  | 3.51919E-05 | #N/A        |
| PSB3_MOUSE     | LNLVELK              |         | 0.000365495 | #N/A        | #N/A        | #N/A        | #N/A        | 0.000129319 |
| PSB3_MOUSE     | NCVAIAADR            |         | 0.000132598 | 2.9772E-05  | #N/A        | 9.06856E-05 | #N/A        | #N/A        |
| PSB3_MOUSE     | NCVAIAADRR           |         | 0.000107808 | #N/A        | 2.10447E-05 | 4.60363E-05 | 4.21245E-05 | #N/A        |
| PSB3_MOUSE     | GKNCAIAADRR          |         | #N/A        | #N/A        | 3.63018E-05 | 8.01416E-05 | 7.57144E-05 | #N/A        |
| PSB3_MOUSE     | LYIGLAGLATDVQTVQQR   |         | #N/A        | #N/A        | #N/A        | 0.000140123 | #N/A        | #N/A        |
| PSB4_MOUSE     | AHSWLTR              |         | 0.000167073 | 7.80921E-05 | #N/A        | 8.69866E-05 | 0.000140668 | 0.000149537 |
| PSB4_MOUSE     | EVLEKQPVLSQTEAR      |         | 0.000419645 | 0.000296412 | #N/A        | 3.20139E-05 | 6.93667E-05 | 6.10979E-05 |

| Dupl. Digest 2 | SwissProt ID    | Peptide | XICs        |             |             |             |             |             |
|----------------|-----------------|---------|-------------|-------------|-------------|-------------|-------------|-------------|
|                |                 |         | liver_corr  | spleen_corr | heart_corr  | kidney_corr | thymus_corr | lung_corr   |
| PSB4_MOUSE     | FQIATVTEK       |         | 0.001400136 | 0.000795328 | 0.000321694 | 0.00101596  | 0.001321955 | 0.000702786 |
| PSB4_MOUSE     | QPVLSQTEAR      |         | 0.001744261 | 0.000602129 | 0.000291522 | 0.000820176 | 0.00101364  | #N/A        |
| PSB4_MOUSE     | TQNPMTGTSTVLGVK |         | #N/A        | 0.000282923 | #N/A        | 0.000711623 | #N/A        | #N/A        |
| PSB4_MOUSE     | FRNISR          |         | #N/A        | #N/A        | #N/A        | #N/A        | #N/A        | 1.57652E-05 |
| PSB5_MOUSE     | AIYQATYR        |         | 0.000193459 | #N/A        | #N/A        | 0.000220589 | 2.04374E-05 | #N/A        |
| PSB5_MOUSE     | ATAGAYIASQTVK   |         | 0.000771006 | 0.000109217 | 0.000234778 | 0.000743931 | 8.87493E-05 | #N/A        |
| PSB5_MOUSE     | ATAGAYIASQTVKK  |         | 7.93578E-05 | #N/A        | #N/A        | 6.03214E-05 | #N/A        | 4.23151E-05 |
| PSB5_MOUSE     | DAYSGGAVNLYHVR  |         | 0.000363246 | #N/A        | 0.000249042 | 0.000516562 | 4.04945E-05 | 0.000217798 |
| PSB5_MOUSE     | RAIYQATYR       |         | 0.000237261 | 2.6948E-05  | #N/A        | 0.000222666 | 1.85963E-05 | #N/A        |
| PSB5_MOUSE     | RGPGLYYVDSSEGNR |         | 3.98868E-05 | #N/A        | 0.000136897 | 5.48873E-05 | #N/A        | 9.25836E-05 |
| PSB5_MOUSE     | VEEAYDLAR       |         | 0.000447006 | #N/A        | 0.000189548 | 0.000494822 | 5.16214E-05 | 0.000174628 |
| PSB5_MOUSE     | VSSDNVADLHDK    |         | 4.2364E-05  | #N/A        | #N/A        | 4.49483E-05 | #N/A        | 1.49167E-05 |
| PSB5_MOUSE     | LLANMVYQYK      |         | #N/A        | 1.26974E-05 | #N/A        | #N/A        | #N/A        | #N/A        |
| PSB5_MOUSE     | FLHGVIVAADSR    |         | #N/A        | #N/A        | 9.85521E-05 | 8.67313E-05 | #N/A        | #N/A        |
| PSB5_MOUSE     | GPGLYYVDSSEGNR  |         | #N/A        | #N/A        | 0.000121157 | #N/A        | #N/A        | #N/A        |
| PSB5_MOUSE     | ISVAASK         |         | #N/A        | #N/A        | 8.53697E-05 | #N/A        | #N/A        | #N/A        |
| PSB6_MOUSE     | DGSSGGVIR       |         | 0.000236268 | 5.98419E-05 | #N/A        | 0.000171741 | 0.000129433 | #N/A        |
| PSB6_MOUSE     | LAAIQESGVER     |         | 0.002592204 | 0.000586248 | 0.000867048 | 0.001568188 | 0.001676774 | 0.001515879 |
| PSB6_MOUSE     | QVLLGDQIPK      |         | 0.001472067 | 0.000334911 | #N/A        | #N/A        | #N/A        | #N/A        |
| PSB6_MOUSE     | TTTGSYIANR      |         | 0.001688916 | 0.000277344 | 0.00057964  | 0.000862767 | 0.000688847 | 0.000720894 |
| PSB6_MOUSE     | FTIATLPPP       |         | #N/A        | #N/A        | #N/A        | 0.000195141 | #N/A        | #N/A        |
| PSB7_MOUSE     | ATEGMVVADK      |         | 0.000280982 | 5.70048E-05 | #N/A        | 0.000186125 | 0.000185016 | 8.59363E-05 |
| PSB7_MOUSE     | ATEGMVVADKNCCK  |         | 0.000397062 | 7.4507E-05  | 0.000186095 | 0.000229509 | 0.000205511 | 0.000152321 |
| PSB7_MOUSE     | FRPDMEEEAK      |         | 0.000275765 | 4.04454E-05 | #N/A        | #N/A        | 0.000106555 | #N/A        |
| PSB7_MOUSE     | FRPDMEEEAKK     |         | 1.63223E-05 | #N/A        | #N/A        | 9.90143E-05 | #N/A        | #N/A        |
| PSB7_MOUSE     | DGIVLGADTR      |         | #N/A        | 0.000149035 | 0.000255126 | 0.000527739 | 0.000507756 | 0.000301631 |
| PSB7_MOUSE     | GTTAVLTEK       |         | #N/A        | #N/A        | 0.000458584 | #N/A        | 0.00079171  | 0.00077661  |
| PSB8_MOUSE     | AIAYATHR        |         | 0.000306117 | 0.000288925 | 1.73231E-05 | 8.65915E-05 | 0.000472183 | #N/A        |
| PSB8_MOUSE     | ATAGSYISSLR     |         | 0.000443887 | 0.000518632 | #N/A        | 9.60563E-05 | 0.001100915 | 0.000275573 |
| PSB8_MOUSE     | DNYSGGVVNMYHMK  |         | 4.80292E-05 | #N/A        | #N/A        | 2.06294E-05 | 7.1411E-05  | #N/A        |
| PSB8_MOUSE     | GPGLYYVDDNGTR   |         | 5.48568E-05 | #N/A        | #N/A        | #N/A        | #N/A        | #N/A        |
| PSB8_MOUSE     | QDLSPEEAYDLGR   |         | 0.000441611 | 0.000351782 | #N/A        | 0.000146114 | 0.000712073 | 0.000144278 |
| PSB8_MOUSE     | QDLSPEEAYDLGRR  |         | 5.1153E-05  | #N/A        | #N/A        | #N/A        | 8.27096E-05 | 4.11454E-05 |
| PSB8_MOUSE     | FQHGIVAVDSR     |         | #N/A        | 9.45955E-05 | 1.68863E-05 | #N/A        | 0.000120274 | #N/A        |
| PSB8_MOUSE     | RGPGLYYVDDNGTR  |         | #N/A        | 6.52827E-05 | #N/A        | 1.35709E-05 | #N/A        | 2.01261E-05 |
| PSB8_MOUSE     | RAIAYATHR       |         | #N/A        | 2.60048E-05 | #N/A        | #N/A        | #N/A        | #N/A        |
| PSB8_MOUSE     | ISVSAASK        |         | #N/A        | #N/A        | #N/A        | #N/A        | 0.000409049 | #N/A        |
| PSB9_MOUSE     | VSAGTAVVNR      |         | 0.00033265  | 0.000399989 | 1.66518E-05 | 8.78151E-05 | 0.000449427 | 0.000104417 |
| PSB9_MOUSE     | FTTNAITLAMNR    |         | #N/A        | #N/A        | #N/A        | 1.49144E-05 | #N/A        | 1.38906E-05 |

Supplementary Table 9. Corrected peptide XICs averaged per subunit in digest 2 (duplicate).

| Dupl. Digest 2 | SwissProt ID | Systematic | average XICs/subunit |                |                  |                 |                  |                 |
|----------------|--------------|------------|----------------------|----------------|------------------|-----------------|------------------|-----------------|
|                |              |            | Pept. ave spleen     | Pept. ave lung | Pept. ave thymus | Pept. ave heart | Pept. ave kidney | Pept. ave liver |
| PSA6_MOUSE     |              | $\alpha$ 1 | 0.000286418          | 0.0004736      | 0.000906261      | 0.00021716      | 0.00063244       | 0.0008192       |
| PSA2_MOUSE     |              | $\alpha$ 2 | 0.000258159          | 0.0003146      | 0.000525452      | 0.00012886      | 0.000217349      | 0.0001909       |
| PSA4_MOUSE     |              | $\alpha$ 3 | 0.00022585           | 0.0003259      | 0.0006311        | 0.00018971      | 0.000424352      | 0.0005678       |
| PSA7_MOUSE     |              | $\alpha$ 4 | 0.000188309          | 0.0001945      | 0.000580673      | 0.00037403      | 0.00040622       | 0.0003979       |
| PSA5_MOUSE     |              | $\alpha$ 5 | 0.000280908          | 0.0005332      | 6.56534E-05      | 0.00018874      | 0.000243911      | 0.0006587       |
| PSA1_MOUSE     |              | $\alpha$ 6 | 0.000358811          | 0.0002599      | 0.0002466        | 0.00014382      | 0.000275425      | 0.0007044       |
| PSA3_MOUSE     |              | $\alpha$ 7 | 0.000242148          | 0.0002987      | 0.000184014      | 0.00011908      | 0.00026865       | 0.0004562       |
| PSB6_MOUSE     |              | $\beta$ 1  | 0.000314586          | 0.0011184      | 0.000831685      | 0.00072334      | 0.000699459      | 0.0014974       |
| PSB9_MOUSE     |              | $\beta$ i  | 0.000399989          | 5.915E-05      | 0.000449427      | 1.6652E-05      | 5.13647E-05      | 0.0003327       |

| Dupl. Digest 2 | SwissProt ID | Systematic | average XICs/subunit |                |                  |                 |                  | Pept. ave liver |
|----------------|--------------|------------|----------------------|----------------|------------------|-----------------|------------------|-----------------|
|                |              |            | Pept. ave spleen     | Pept. ave lung | Pept. ave thymus | Pept. ave heart | Pept. ave kidney |                 |
|                | PSB7_MOUSE   | β2         | 8.0248E-05           | 0.0003294      | 0.00035931       | 0.00029994      | 0.000260597      | 0.0002425       |
|                | PSB10_MOUSE  | β2i        | 6.82554E-05          | 0.0001068      | 0.000514967      | 4.0444E-05      | 0.000113249      | 0.0001505       |
|                | PSB3_MOUSE   | β3         | 2.29896E-05          | 0.0001293      | 5.10103E-05      | 2.8673E-05      | 7.94478E-05      | 0.0001675       |
|                | PSB2_MOUSE   | β4         | 0.000190331          | 0.0001513      | 0.000153824      | 5.2221E-05      | 0.000137416      | 0.000127        |
|                | PSB5_MOUSE   | β5         | 4.96207E-05          | 0.0001084      | 4.39798E-05      | 0.00015933      | 0.000271718      | 0.0002717       |
|                | PSB8_MOUSE   | β5i        | 0.000224204          | 0.0001203      | 0.000424088      | 1.7105E-05      | 7.25923E-05      | 0.0002243       |
|                | PSB1_MOUSE   | β6         | 0.000220172          | 0.0001891      | 0.000541001      | 0.0002388       | 0.000292907      | 0.0001839       |
|                | PSB4_MOUSE   | β7         | 0.000410977          | 0.0002323      | 0.000636407      | 0.00030661      | 0.000533352      | 0.0009328       |

## References

1. R. Raijmakers, C. R. Berkers, A. de Jong, H. Ovaa, A. J. R. Heck and S. Mohammed, *Mol. Cell. Proteomics*, 2008, **7**, 1755-1762.
2. C. R. Berkers, F. W. B. van Leeuwen, T. A. Groothuis, V. Peperzak, E. W. van Tilburg, J. Borst, J. J. Neefjes and H. Ovaa, *Mol. Pharmaceutics*, 2007, **4**, 739-748.
